# 1 Ancestry-dependent Enrichment of Deleterious Homozygotes in Runs of 2 Homozygosity

3  
4 *Zachary A. Szpiech<sup>1,\*</sup>, Angel C.Y. Mak<sup>2</sup>, Marquitta J. White<sup>2</sup>, Donglei Hu<sup>2</sup>, Celeste Eng<sup>2</sup>, Esteban G.  
5 Burchard<sup>2</sup>, Ryan D. Hernandez<sup>1,3,4,5,6\*</sup>*

6  
7 <sup>1</sup> Department of Bioengineering and Therapeutic Sciences, University of California San Francisco, San  
8 Francisco, California, USA.

9 <sup>2</sup> Department of Medicine, University of California San Francisco, San Francisco, California, USA.

10 <sup>3</sup> Institute for Human Genetics, University of California San Francisco, San Francisco, California, USA.

11 <sup>4</sup> Quantitative Biosciences Institute, University of California San Francisco, San Francisco, California, USA.

12 <sup>5</sup> Department of Human Genetics, McGill University, Montreal, Quebec, Canada.

13 <sup>6</sup> Genome Quebec Innovation Center, McGill University, Montreal, Quebec, Canada.

14  
15 \* Corresponding authors: zachary.szpiech@ucsf.edu, ryan.hernandez@me.com

## 16 17 18 **Abstract**

19       Runs of homozygosity (ROH) are important genomic features that manifest when an  
20 individual inherits two haplotypes that are identical-by-descent. Their length distributions are  
21 informative about population history, and their genomic locations are useful for mapping recessive  
22 loci contributing to both Mendelian and complex disease risk. We have previously shown that  
23 ROH, and especially long ROH that are likely the result of recent parental relatedness, are  
24 enriched for homozygous deleterious coding variation in a worldwide sample of outbred  
25 individuals. However, the distribution of ROH in admixed populations and their relationship to  
26 deleterious homozygous genotypes is understudied. Here we analyze whole genome sequencing  
27 data from 1,441 individuals from self-identified African American, Puerto Rican, and Mexican  
28 American populations. These populations are three-way admixed between European, African, and  
29 Native American ancestries and provide an opportunity to study the distribution of deleterious  
30 alleles partitioned by local ancestry and ROH. We re-capitulate previous findings that long ROH  
31 are enriched for deleterious variation genome-wide. We then partition by local ancestry and show  
32 that deleterious homozygotes arise at a higher rate when ROH overlap African ancestry segments  
33 than when they overlap European or Native American ancestry segments of the genome. These  
34 results suggest that, while ROH on any haplotype background are associated with an inflation of

35 deleterious homozygous variation, African haplotype backgrounds may play a particularly  
36 important role in the genetic architecture of complex diseases for admixed individuals, highlighting  
37 the need for further study of these populations.

## 38 **Introduction**

39         Runs of Homozygosity (ROH) are long stretches of identical-by-descent (IBD) haplotypes  
40 that manifest in individual genomes as the result of recent parental relatedness. Originally  
41 conceived to improve the accuracy of homozygosity mapping of recessive Mendelian diseases,  
42 ROH have formed the foundation of studies investigating the contribution of recessive deleterious  
43 variants to the genetic risk for complex diseases and the to the determination of complex traits [1].  
44 Moreover, they have provided unique insights into the demographic and sociocultural processes  
45 [1] that have shaped genomic variation patterns in contemporary worldwide human populations [2-  
46 12], ancient hominins [13-16], non-human primates [17, 18], woolly mammoths [19], livestock [20-  
47 26], birds [27, 28], felines [29], and canids [30-39]. Recent population bottlenecks, cultural  
48 preferences for endogamy or consanguineous marriage, and natural selection, can create  
49 increased rates of ROH in individual genomes, substantially increasing overall homozygosity in  
50 such populations.

51         Several studies of the distribution of ROH in ostensibly outbred human populations have  
52 shown that ROH are common and range in size from tens of kilobases to several megabases in  
53 length [2-8]. Furthermore, total length and prevalence of ROH are correlated with distance from  
54 Africa [5, 7, 8], with more and longer ROH manifesting in individuals from populations a longer  
55 distance away. These patterns likely reflect increased IBD among haplotypes as a result of the  
56 serial bottleneck process that humans experienced as they migrated out of Africa.

57         The prevalence of ROH in individual genomes has also been an important factor for  
58 understanding the genetic basis of complex phenotypes [40-43]. High levels of ROH have been  
59 associated with heart disease [44-47], cancer [44, 48-52], blood pressure [53-57], LDL cholesterol

60 [57], various mental disorders [58-63], human height [64, 65], and increased susceptibility to  
61 infectious diseases [66]. Indeed, these results are consistent with the idea that many rare alleles  
62 of small effect may be the cause of increased risk for complex diseases [67-71], especially if these  
63 mutations are recessive [4, 72].

64 We have previously shown that ROH, especially long ROH, are enriched for deleterious  
65 homozygous variation [73, 74]. Whereas an overall increase in homozygotes is expected with  
66 increasing genomic ROH, we have shown that the rate at which deleterious homozygotes  
67 accumulate outpaces the rate at which benign homozygotes accumulate [73, 74] in long ROH  
68 (ROH on the order of several megabases). This result is a consequence of young (long)  
69 haplotypes with low-frequency variants segregating on them being paired IBD [74]. As low-  
70 frequency variants are more likely to be deleterious, the processes that create very long ROH can  
71 also generate unusually high numbers of deleterious homozygotes within these regions.

72 Although a few studies describing the worldwide distribution of ROH patterns have included  
73 a small number of admixed populations [5, 7, 8], the number of individuals per admixed population  
74 has been fairly small. Even as the number of admixed individuals continues to grow in the United  
75 States [75], they are still relatively understudied, which translates to disparities in our  
76 understanding of population-specific genetic factors that may influence complex phenotypes [76,  
77 77]. Indeed, admixed populations have unique features compared to other populations, in that  
78 genomes from these populations are recent combinations of two or more ancestral populations.

79 This ancestral mosaicism has been exploited to make inferences about the natural history  
80 of human populations [78-88] and to search for ancestral haplotypes that influence complex  
81 phenotypes [89-96]. Here we add to the body of work on admixed populations by examining the  
82 relationship between ROH, local ancestry, and the accumulation of deleterious alleles. We use  
83 1,441 recently published [97] whole genome sequences (dbGaP accession numbers phs000920  
84 and phs000921) distributed roughly equally across three admixed populations in the Americas:

85 African American ( $n = 475$ ), Mexican American ( $n = 483$ ), and Puerto Rican ( $n = 483$ ). Each of  
86 these populations is three-way admixed between European, Native American, and African  
87 ancestral populations, although each has a distinct history.

88         Among the ancestral populations that contributed haplotypes to these admixed populations,  
89 it has been shown that the distribution of deleterious heterozygotes and deleterious homozygotes  
90 changes with distance from Africa [98-101]. With this in mind, we propose that accumulation of  
91 deleterious homozygotes via increased genomic ROH may also differ within admixed populations  
92 based on differing ancestral haplotypes. Indeed, with high deleterious heterozygosity, we propose  
93 that African ancestral haplotypes may be most susceptible to large increases in deleterious  
94 homozygotes when subjected to harsh bottlenecks or inbreeding, as these low frequency  
95 deleterious alleles will be paired into homozygotes as a result of increased genomic ROH.

96

## 97 **Results**

### 98 **Admixture**

99         Using the subset of sites from our whole-genome sequencing data that intersected with our  
100 African, European, and Native American reference panels, we called 3-way local ancestry tracts in  
101 all 1,441 samples (see Methods). We also estimated global ancestry proportions by summing the  
102 length of all haplotypes inferred to be from a given ancestry and dividing by the total genome  
103 length. Fig 1 summarizes the global ancestry proportions for all individuals from each population  
104 on a ternary plot. The admixture proportions largely accord with previous results in these  
105 populations, with Puerto Ricans having mostly African and European ancestry, Mexican  
106 Americans having mostly European and Native American ancestry, and African Americans having  
107 mostly African and European ancestry to the near exclusion of any Native American ancestry.  
108 However, although African Americans are frequently treated as a 2-way admixed population  
109 between European and African sources, we show that several AA individuals have non-trivial

110 proportions of Native American ancestry. This suggests that, in general, a 2-way admixture model  
111 may not be uniformly appropriate for studying admixture patterns amongst self-identified African  
112 American individuals.

### 113 **Runs of Homozygosity**

114 We followed the ROH calling pipeline of Pemberton et al. [7] as implemented in the  
115 software GARLIC [102] to call ROH from the full whole-genome sequencing data (see Methods).  
116 This method identifies three classes of ROH based on the length distribution in each population.  
117 We refer to these size classes as short, medium, and long. These classes roughly correspond to  
118 ROH formed of IBD haplotypes from different time periods from the population history. Short ROH  
119 are tens of kilobases in length and likely reflect the homozygosity of old haplotypes; medium ROH  
120 are hundreds of kilobases in length and likely reflect background relatedness in the population;  
121 and long ROH are hundreds of kilobases to several megabases in length and are likely the result  
122 of recent parental relatedness. Total length of ROH in the genome is correlated with distance  
123 from Africa [4, 7]. In the case of our admixed populations, we therefore expect the total length of  
124 ROH to be correlated with increased European and Native American admixture fraction. Indeed,  
125 Fig 2A illustrates this pattern, with AA individuals having lowest total ROH, PR individuals having  
126 intermediate total ROH, and MX individuals having the highest total ROH (all pairwise Mann-  
127 Whitney U tests  $p < 2.2 \times 10^{-16}$ ). Breaking down ROH by size class, we find that the total length  
128 of short ROH is comparable between PR and MX individuals (Fig 2B), but the total length of both  
129 medium ROH (Fig 2C) and total long ROH (Fig 2D) is highest on average in MX individuals.

### 130 **Deleterious Alleles**

131 We used multiple approaches to predict the deleteriousness of all sites in the genome (see  
132 Methods), but focus on missense mutations classified as Probably Damaging, Possibly Damaging,  
133 or Benign using Polyphen 2 [103]. As in [73], we combine the Probably Damaging and Possibly  
134 Damaging mutations into a single “damaging” class, and we combine all Benign mutations with

135 synonymous mutations into a single “benign” class. For individual  $i$  across all sites, we denote by  
136  $g_i^{d,k}$  and  $g_i^{b,k}$  the total number of sites with  $k \in \{0,1,2\}$  alternate alleles classified as damaging or  
137 benign, respectively. In Fig 3A we plot the distribution of deleterious heterozygotes per individual,  
138  $g_i^{d,1}$ , split by population. Consistent with previous work [98-101], we see an increased number of  
139 deleterious heterozygotes in populations with more African ancestry, with AA individuals having  
140 the most and MX individuals having the fewest (patterns replicate with other deleterious  
141 categories, see S5-S10 Figs). Conversely, we would expect an increase of deleterious  
142 homozygotes per individual in populations with more non-African ancestry. Indeed, in Fig 3B we  
143 plot the distribution of deleterious homozygotes per individual,  $g_i^{d,2}$ , split by population and  
144 observe AA individuals with the fewest and MX individuals having the most (these patterns also  
145 replicate with other deleterious categories, see S5-S10 Figs). Figure 3C plots the total number of  
146 deleterious alleles per individual ( $g_i^{d,1} + 2g_i^{d,2}$ ). Contrary to other work [101], we find a total  
147 deleterious load highest on average in AA individuals. Although this pattern replicates across  
148 several other deleterious calling methods (S5-S9 Figs), when using GERP scores (as in [101]) the  
149 pattern reverses (S10 Fig) and is consistent with [101].

### 150 **Deleterious Alleles Across Local Ancestry**

151 We next investigate whether there are any differences in deleterious load by local ancestry.  
152 Although our local ancestry calls provide us with phased local ancestry inferences, we were  
153 limited to a small subset of sites for our reference populations. Since the vast majority of our  
154 deleterious alleles come from our unphased whole-genome data, we do not have phase  
155 information for the deleterious alleles and cannot assign a specific ancestral haplotype in regions  
156 of discordant ancestry. Therefore, we calculate total load based on six different ancestry  
157 backgrounds. AFR, EUR, and NAM ancestry regions represent regions that are homozygous for  
158 African, European, and Native American ancestries, respectively, and AFEU, EUNA, and AFNA  
159 ancestry regions represent regions that are called heterozygous for African/European,

160 European/Native American, and African/Native American ancestries, respectively. We then  
161 calculate for each population the number of deleterious alleles per basepair for each ancestry  
162 background.

163 Table 1 shows the number of deleterious alleles per basepair for each population and each  
164 ancestry background. We perform two types of tests for independence in order to determine  
165 whether there are significant differences in the number of deleterious alleles per basepair. First,  
166 we test for independence of the count of deleterious alleles on an ancestry background and the  
167 count of basepairs covered by that ancestry across populations. We find that neither African  
168 ancestry nor European ancestry have statistical differences in the number of deleterious alleles  
169 per MB across populations. Further, while NAM, EUAF, and AFNA exhibit statistically differences  
170 across populations, it appears to be driven by one of the two populations (AA, MX, and PR,  
171 respectively). Next, we test for independence of these counts across ancestries within each  
172 population. Here we find that all populations have statistically significant differences in the  
173 distribution of deleterious alleles across ancestry backgrounds (AA  $p < 2.2 \times 10^{-16}$ ; MX  $p < 2.2 \times$   
174  $10^{-16}$ ; PR  $p < 2.2 \times 10^{-16}$ ), with NAM ancestry having the lowest rate in AA and PR individuals  
175 and EUR having the lowest rate in MX individuals. However, we note that the overall differences  
176 were very small (a difference of  $< 0.1$  deleterious alleles per Mbp).

### 177 **Deleterious Alleles in ROH**

178 Next, we turn to examining the distribution of deleterious homozygotes within ROH. It was  
179 previously reported [73, 74] that there is a higher proportion of deleterious homozygotes per unit  
180 increase of ROH than expected from the proportion of benign homozygotes. Naturally, as the  
181 total amount of genomic ROH increases, we expect more homozygotes to fall within ROH.  
182 However, [73] and [74] found that the rate of increase of the proportion of deleterious  
183 homozygotes was greater than for benign homozygotes. This effect was strongest for long ROH,  
184 which are likely the result of recent parental relatedness.

185 For each individual  $i$  and for each ROH class  $j \in \{A, B, C, R, N\}$  (A - short ROH, B - medium  
186 ROH, C - long ROH, R - all ROH, and N - outside ROH), we define the number of damaging or  
187 benign sites with  $k \in \{0, 1, 2\}$  alternate alleles as  $g_{i,j}^{d,k}$  and  $g_{i,j}^{b,k}$ , respectively. Thus we calculate the  
188 proportion of damaging homozygotes in ROH class  $j$  as

$$f_{i,j}^d = \frac{g_{i,j}^{d,2}}{g_{i,R}^{d,2} + g_{i,N}^{d,2}}$$

189 and the proportion of benign homozygotes in ROH as

$$f_{i,j}^b = \frac{g_{i,j}^{b,2}}{g_{i,R}^{b,2} + g_{i,N}^{b,2}}$$

190 respectively. We also compute, for each individual  $i$  and each class  $j$ , the fraction of the genome  
191 covered in ROH as

$$G_{i,j} = \frac{\text{total length of ROH regions of class } j \text{ in individual } i}{\text{total genome length}}$$

192 We plot the proportions of ROH homozygotes versus genomic fraction of ROH in Fig 4,  
193 which is analogous to Fig 4 from [73]. In order to determine if there is a statistically significant  
194 difference in the accumulation of deleterious homozygotes versus benign homozygotes, we  
195 construct a linear regression model (as in [73, 74]),  $f_{\cdot,j} = \beta_0 + \beta_1 G_{\cdot,j} + \beta_2 D + \beta_3 D G_{\cdot,j} + \varepsilon$ , where  $f_{\cdot,j}$   
196 is a vector of length 2,882 containing the proportions of both damaging and benign homozygotes  
197 in ROH class  $j$  for all individuals,  $G_{\cdot,j}$  is a vector of genomic class  $j$  ROH proportions, and  $D$  is an  
198 indicator variable taking a value of 1 when the response represents damaging homozygotes and 0  
199 for benign homozygotes. In this framework, a statistically significant  $\beta_2$  suggests an overall higher  
200 proportion of damaging homozygotes in ROH compared to benign homozygotes, e.g.  $\beta_2 = 0.1$   
201 means that an extra 10% of genome-wide deleterious homozygotes fall in ROH compared to the  
202 distribution of benign homozygotes. A statistically significant  $\beta_3$  suggests a difference in the rate of  
203 accumulation per unit increase of ROH, e.g.  $\beta_3 = 1.0$  means that for a 10% increase in genomic



204 ROH, 10% more deleterious homozygotes fall in ROH compared to benign homozygotes. Inferred  
205 coefficients for the four regressions corresponding to each  $j \in \{A, B, C, R\}$  are given in Table 2.

206 Fig 4A plots these proportions versus total ROH for all ROH classes combined. In  
207 agreement with [73], we find that there is an overall greater proportion of damaging homozygotes  
208 in ROH compared to benign homozygotes ( $\beta_2 = 0.1799$ ,  $p < 2 \times 10^{-16}$ ), but in contrast the  
209 overall rate of accumulation is not different ( $\beta_3 = 1.807 \times 10^{-2}$ ,  $p = 0.0671$ ). When we partition  
210 ROH by size class, the distribution of homozygotes in short ROH (Fig 4B) also differs from [73].  
211 Whereas previously there were no statistically significant differences in  $\beta_2$  or  $\beta_3$ , here we find a  
212 significant positive  $\beta_2 = 4.810 \times 10^{-2}$  ( $p < 2 \times 10^{-16}$ ) and a statistically significant negative  
213  $\beta_3 = -0.428$  ( $p = 1.10 \times 10^{-8}$ ) suggesting that ROH comprised of old haplotypes accumulate  
214 deleterious homozygotes at a slower rate than benign homozygotes. As we expect short ROH to  
215 be comprised of old haplotypes that have been segregating for a long time, it is reasonable to  
216 think that only haplotypes with relatively few deleterious alleles remain segregating in the  
217 population. Our results for medium (Fig 4C) and long ROH (Fig 4D) are consistent with previous  
218 work [73, 74]; in particular we find that the difference in rates of gain of deleterious versus benign  
219 homozygotes is greatest in long ROH ( $\beta_3 = 0.229$ ;  $p < 2 \times 10^{-16}$ ).

## 220 **Deleterious Alleles in ROH Partitioned by Local Ancestry**

221 Now we turn to analyzing the distribution of deleterious homozygotes in ROH comprised of  
222 only one particular ancestral haplotypes. As shown in Fig 3A and in other work [98-101],  
223 populations with more African ancestry tend to have high numbers of deleterious heterozygotes  
224 genome-wide. This contrasts with populations that have more European and Native American  
225 ancestry, which tend to have more genome-wide deleterious homozygotes (Fig 3B) as a result of  
226 the serial bottlenecks they experienced since migrating out of Africa.

227 However, admixed populations are a recent combination of two or more ancestral  
228 populations, and since genome-wide ancestry proportions correlate with numbers of deleterious

229 heterozygotes and homozygotes, we desire to investigate how this mosaicism might affect the  
230 accumulation of deleterious homozygotes in ROH. We have already shown (Fig 4) that as total  
231 genomic ROH increases the proportion of deleterious homozygotes falling in ROH increases  
232 faster than the proportion of benign homozygotes, but here we want to know if the ancestral  
233 background of the IBD haplotypes matters. Here we propose that haplotypes sourced from  
234 ancestral populations with high deleterious heterozygosity have highest rates of accumulation of  
235 deleterious homozygotes when paired IBD to generate ROH.

236 Why might we expect high deleterious heterozygosity haplotypes to generate large  
237 numbers of deleterious homozygotes in ROH? Pemberton and Szpiech [74] recently  
238 demonstrated that long ROH are enriched for homozygotes comprised of low-frequency alleles.  
239 Low-frequency alleles are more likely to be deleterious and are more likely to manifest in  
240 individual genomes as heterozygotes. Under a typical random mating scenario these low  
241 frequency alleles would be likely to segregate in the population largely as heterozygotes, however  
242 severe bottlenecks and cultural practices such as endogamy and consanguineous marriage  
243 substantially raise the likelihood of pairing low-frequency alleles as IBD homozygotes. We  
244 therefore expect that deleterious homozygotes will be concentrated in large proportion within ROH  
245 comprised of African ancestral haplotypes, and that the rate of gain of deleterious homozygotes  
246 will be greatest in ROH of African ancestral haplotypes.

247 To test this proposition, we first partition ROH based on the ancestral background of the  
248 underlying IBD haplotypes. Then we compute for each individual ( $i$ ) the fraction of all deleterious  
249 ( $d$ ) and benign ( $b$ ) homozygotes across the genome that fall into each ROH class ( $j$ ) as:

$$f_{i,j}^d(A) = \frac{g_{i,j}^{d,2}(A)}{g_{i,R}^{d,2} + g_{i,N}^{d,2}}$$

250 and

$$f_{i,j}^b(A) = \frac{g_{i,j}^{b,2}(A)}{g_{i,R}^{b,2} + g_{i,N}^{b,2}}$$

251 where  $g_{i,j}^{d,2}(A)$  and  $g_{i,j}^{b,2}(A)$  are the number of deleterious and benign homozygotes, respectively,  
252 in individual  $i$  in ROH class  $j$  on ancestral haplotype background  $A \in \{AFR, EUR, NAM\}$ . Similarly,  
253  $f_{i,j}^d(A)$  and  $f_{i,j}^b(A)$  are the genome-wide fraction of deleterious and benign homozygotes,  
254 respectively, in individual  $i$  in ROH class  $j$  that fall on haplotype background  $A$ . Finally, we fit a  
255 linear model similar as above,  $f_{i,j}(A) = \beta_0 + \beta_1 G_{i,j}(A) + \beta_2 D + \beta_3 D G_{i,j}(A) + \varepsilon$ , in order to test for  
256 differences in the rate of accumulation ( $\beta_3$ ) of deleterious homozygotes compared to benign  
257 homozygotes as a function of  $G_{i,j}(A)$ , the genomic fraction of ROH on ancestral background  $A$ .  
258 The results are plotted in Fig 5 for total ROH ( $j = N$ ; Fig 5A-C) and for long ROH ( $j = C$ ; Fig 5D-  
259 F), and the regression coefficients are also summarized in Table 3.

260 For total ROH, we find significant differences in the rate of accumulation of deleterious  
261 homozygotes on all ancestry backgrounds (Fig 5A-C). Furthermore, consistent with our  
262 expectations, we find that ROH on African ancestral haplotypes have the highest rate difference  
263 ( $\beta_3 = 1.214, p < 2 \times 10^{-16}$ ; Fig 5C), whereas ROH on European ancestral haplotypes have an  
264 intermediate rate difference ( $\beta_3 = 0.648, p < 2 \times 10^{-16}$ ; Fig 5B) and ROH on Native American  
265 ancestral haplotypes have the lowest rate difference ( $\beta_3 = 0.510, p < 2 \times 10^{-16}$ ; Fig 5A). This  
266 pattern is repeated when we consider only long ROH comprised of young haplotypes (Fig 5D-F)  
267 and also when we analyze smaller ROH (albeit with weaker effects; S1 Fig).

268 We next directly compare the rate of increase of deleterious homozygotes across different  
269 ancestral haplotype backgrounds. To do this we compute the following regression,  
270  $f_{i,j}^d(\cdot) = \beta_0 + \beta_1 G_{i,j}(\cdot) + \beta_2 I(EUR) + \beta_3 I(NAM) + \beta_4 I(EUR)G_{i,j}(\cdot) + \beta_5 I(NAM)G_{i,j}(\cdot) + \varepsilon$ , where  
271  $f_{i,j}^d(\cdot)$  is a vector representing the proportion of damaging homozygotes in ROH class  $j$  on each  
272 local ancestry background across all individuals.  $G_{i,j}(\cdot)$  represents the genome-wide fraction ROH

273 class  $j$  falling on each local ancestry background across all individuals, and  $I(A)$  is an indicator  
274 variable which takes the value 1 if the associated response is on ancestral background  $A \in$   
275  $\{AFR, EUR, NAM\}$  and takes the value 0 otherwise. Here we analyze each ROH class: all, long,  
276 medium, and short.

277 We plot the results for “all” and “long” in Fig 6 (“medium” and “short” in S2 Fig) and  
278 summarize the inferred regression coefficients for all classes in Table 4. We focus on the  
279 regression coefficients  $\beta_4$  and  $\beta_5$ , which represent the difference in rate of gain of deleterious  
280 homozygotes in ROH on European or Native American haplotypes compared to African  
281 haplotypes, respectively. Graphically, in Fig 6 and S2 Fig, a significant  $\beta_4$  corresponds to a  
282 significant difference in the slope of the orange and blue line, and a significant  $\beta_5$  corresponds to a  
283 significant difference in the slope of the orange and purple line. Since we expect that the rate of  
284 gain of deleterious homozygotes to be lowest in ROH on European and Native American  
285 haplotypes compared to ROH on African ones, we expect significant negative values for both  $\beta_4$   
286 and  $\beta_5$ .

287 Consistent with our expectations, when analyzing all ROH (Fig 6A) we find a significant  
288 negative  $\beta_4 = -0.763$  ( $p < 2 \times 10^{-16}$ ) and  $\beta_5 = -0.852$  ( $p < 2 \times 10^{-16}$ ), indicating that the gain  
289 rate of damaging homozygotes in ROH on African ancestral haplotypes outpaces that of ROH on  
290 the other ancestral haplotypes. This pattern continues when considering only long ROH ( $\beta_4 =$   
291  $-0.852$ ,  $p < 2 \times 10^{-16}$  ;  $\beta_5 = -0.727$  ,  $p < 2 \times 10^{-16}$ ; Fig 6B) and smaller ROH (Table 4 and S2  
292 Fig).

293 To check the robustness of these results, we reran these analyses using several other  
294 deleterious classification methods including SIFT [104, 105], Provean [106], and GERP [107].  
295 Since GERP scores sites and not mutations, we restricted the GERP analysis to loci where the  
296 ancestral and derived states were inferred to high confidence. As this ancestral polarization  
297 results in discarding a large number of loci with ambiguous ancestral allele state, we also reran

298 these analyses for Polyphen 2 [103], SIFT [104, 105], and Provean [106] restricted only to loci for  
299 which we have ancestral/derived state information. S3 Fig plots the inferred  $\beta_3$  for each of these  
300 analyses for each ROH size class and demonstrates qualitatively similar patterns as shown  
301 above.

302 We further re-analyzed a subset of the ROH and deleteriousness calls from Pemberton and  
303 Szpiech [74], which contains data on six admixed populations from the 1000 Genomes Project  
304 [108] and used CADD [109] scores as a deleteriousness prediction (S1 Text). After extracting the  
305 data relating to the admixed individuals from Pemberton and Szpiech [74] and calling local  
306 ancestries, we again find qualitatively similar patterns as above (S4 Fig).

307 Finally, since Pemberton and Szpiech [74] showed that these enrichment patterns appear  
308 to be driven by an abundance of homozygotes in ROH comprised of low-frequency alleles, we re-  
309 analyzed our data using categories of minor allele frequency (MAF) instead of deleteriousness. In  
310 order to determine MAF category, we use frequencies computed from all TOPMed Freeze 3  
311 whole-genome sequencing data sets (dbGaP accession numbers phs000920, phs000921,  
312 phs001062, phs001032, phs000997, phs000993, phs001189, phs001211, phs001040,  
313 phs001024, phs000974, phs000956, phs000951, phs000946, phs000988, phs000964,  
314 phs000972, phs000954, and phs001143) forming a total sample size of  $n = 18,581$ . Using these  
315 allele frequencies, we categorize each polymorphic locus in a gene region (exons plus introns)  
316 into one of two categories: common ( $MAF \geq 0.05$ ) and rare ( $MAF < 0.05$ ). We then fit the same  
317 models as above, except that instead of comparing the proportion of deleterious alternate allele  
318 homozygotes to benign homozygotes as a function of ROH coverage, we compare the number of  
319 minor allele homozygotes in the rare class to the common class.

320 We summarize the results of these analyses for each ancestral background, each ROH  
321 size class, and each low-frequency class in Fig 7. We find that ROH on African haplotype  
322 backgrounds are gain more low-frequency minor allele homozygotes per unit increase of ROH

323 (and especially long class C ROH) compared to common minor allele homozygotes. Since low  
324 frequency alleles are enriched for deleterious variants relative to high frequency alleles, this result  
325 accords with our previous analyses.

326

## 327 **Discussion**

328 The distribution of runs of homozygosity in individual genomes has provided insights into  
329 evolutionary, population, and medical genetics [1]. By examining their genomic location and  
330 prevalence in a population, we can learn about the history and adaptation of natural populations  
331 [2-39], and we can make discoveries about the genetic basis of complex phenotypes [40-66].  
332 Given the importance of demographic history and socio-cultural practices in the generation of  
333 ROH in individual genomes, and their relationship to complex phenotypes including many genetic  
334 diseases, it naturally follows to study the distribution of deleterious alleles and their relationship to  
335 ROH.

336 Previous work has described the effect of demographic history on the distribution of  
337 deleterious alleles [98-101, 110, 111], including a few specifically investigating their relationship  
338 with runs of homozygosity [21, 38, 73, 74, 112, 113]. However, little work has been done on the  
339 relationship between deleterious alleles and ROH in admixed populations (although see [113]).  
340 Since there is evidence of very recent bottlenecks (which generate ROH) within admixed  
341 populations living in the Americas [88, 113], the relationship between ROH and the accumulation  
342 of deleterious homozygotes may provide valuable insights into the genetic basis of complex  
343 phenotypes in these individuals.

344 Here we analyzed 1,441 individuals across three admixed populations: African American,  
345 Puerto Rican, and Mexican American. We found that, consistent with other studies, the proportion  
346 of deleterious homozygotes found in ROH increases faster than the proportion of benign  
347 homozygotes as a function of total genomic ROH (Fig 4). However, we also proposed that

348 ancestral haplotypes from populations with high deleterious *heterozygosity* would exhibit even  
349 greater increases of deleterious homozygotes per unit ROH. We reason that, under random  
350 mating, the larger number of low-frequency deleterious alleles in the population would largely  
351 segregate as heterozygotes, whereas, when a harsh bottleneck or consanguinity occurs, these  
352 mutations get paired IBD as homozygotes, concentrating more deleterious homozygotes within  
353 ROH. Indeed, we found that the genome-wide proportion of deleterious homozygotes in ROH on  
354 African ancestral haplotypes increased faster per unit ROH than on either European or Native  
355 American ancestral haplotypes (Figs 5 and 6). These patterns are also consistent with population-  
356 specific worldwide patterns of deleterious homozygotes in ROH [74], where three of the five  
357 African populations analyzed had among the highest rates of enrichment in long ROH.

358         Whereas ROH on any haplotype background are associated with an increased rate of  
359 deleterious homozygotes, ROH on African haplotypes tend to have a larger share of the genome-  
360 wide deleterious homozygotes. Indeed, this accords with recent work that has independently  
361 associated increased ROH [65] and increased African ancestry [114] with reduced lung function.  
362 This suggests that these ROH on African haplotypes may play a particularly important role in the  
363 genetic architecture of complex phenotypes in admixed individuals, especially for populations with  
364 African ancestry that have undergone very harsh bottlenecks in the recent past.

365

## 366 **Methods**

### 367 **Calling Local Ancestry**

368         We used 90 African (YRI) individuals and 90 European (CEU) individuals for ancestry  
369 references (genotypes obtained from the Axiom<sup>®</sup> Genotype Data Set at  
370 [https://www.thermofisher.com/us/en/home/life-science/microarray-analysis/microarray-data-](https://www.thermofisher.com/us/en/home/life-science/microarray-analysis/microarray-data-analysis/microarray-analysis-sample-data/axiom-genotype-data-set.html)  
371 [analysis/microarray-analysis-sample-data/axiom-genotype-data-set.html](https://www.thermofisher.com/us/en/home/life-science/microarray-analysis/microarray-analysis-sample-data/axiom-genotype-data-set.html)) and SNPs with less than

372 95% call rate were removed. For Native American reference genotypes we used 71 Native  
373 American individuals previously genotyped on the Axiom<sup>®</sup> Genome-Wide LAT 1 array [115].

374 We then subset our 1,441 whole-genome sequences corresponding to sites found on the  
375 Axiom<sup>®</sup> Genome-Wide LAT 1 array, leaving 765,321 markers. We then merge these data with our  
376 European (CEU), African (YRI), and Native American (NAM) reference panels, which overlapped  
377 at 434,145 markers. After filtering multi-allelic SNPs and SNPs with > 10% missing data, we  
378 obtained a final merged dataset of 428,644 markers. We phased this combined data set using  
379 SHAPEIT2 [116] and called local ancestry tracts jointly with RFMix [117] under a three-way  
380 admixture model based on the African, European, and Native American reference genotypes  
381 described above.

### 382 **Calling Runs of Homozygosity**

383 We called runs of homozygosity using the program GARLIC v1.1.4 [102], which implements  
384 the ROH calling pipeline of [7], for each population separately on the full whole-genome call set,  
385 filtering only monomorphic sites. For the 475 African American (AA) individuals, this left  
386 39,517,679 segregating sites; for the 483 Puerto Rican (PR) individuals, this left 31,961,900  
387 segregating sites; and for the 483 Mexican American (MX) individuals, this left 30,744,389  
388 segregating sites. Instead of asserting a single constant genotyping error rate (as in [7]), we used  
389 genotype quality scores provided with the WGS data to give GARLIC a per-genotype estimation of  
390 error. Using GARLIC's rule of thumb parameter estimation, we chose analysis window sizes of  
391 290 SNPs, 250 SNPs, and 210 SNPs for the AA, PR, and MX populations, respectively. Using  
392 GARLIC's rule of thumb parameter estimation, we chose overlap fractions of 0.3688, 0.3553, and  
393 0.3528 for the AA, PR, and MX populations, respectively. GARLIC chose LOD score cutoffs of -  
394 47.5169, -70.1977, and -60.9221 for the AA, PR, and MX populations, respectively. Using a  
395 three-component Gaussian mixture model, GARLIC determined class A/B and class B/C size



396 boundaries as 38,389 bps and 142,925 bps for AA; as 50,618 bps and 230,079 bps for PR; and  
397 46,979 bps and 217,054 bps for MX.

### 398 **Calling Deleterious Alleles**

399 Using the Whole Genome Sequencing Annotation (WGSA) pipeline [118] to generate  
400 annotation data, we extracted PolyPhen 2 [103], SIFT [104, 105], Provean [106], and GERP [107]  
401 scores for deleteriousness, as well as ancestral allele state and synonymous annotations and for  
402 all mutations in coding regions.

403 PolyPhen 2 generates three deleteriousness categories: Probably Damaging, Possible  
404 Damaging, and Benign. If a mutation has more than one PolyPhen2 classification (e.g. Benign  
405 and Probably Damaging), it is reassigned to have only the most damaging category of the group.  
406 All mutations that have a PolyPhen 2 prediction or that are synonymous, are then pooled into two  
407 separate categories: “damaging” and “benign.” All Probably Damaging or Possibly Damaging  
408 mutations are pooled into the “damaging” category, and all Benign and synonymous mutations are  
409 pooled into the “benign” category.

410 SIFT generates two deleteriousness categories, Intolerant and Tolerant, which we relabel  
411 “damaging” and “benign.” If a mutation has more than one SIFT classification, it is reassigned to  
412 have only the most damaging category of the group.

413 Provean generates two deleteriousness categories, Deleterious and Neutral, which we  
414 relabel “damaging” and “benign.” If a mutation has more than one Provean classification, it is  
415 reassigned to have only the most damaging category of the group.

416 GERP generates a numerical score at a given locus where a higher score indicates more  
417 deleteriousness for a derived allele at that locus. Here we focus on derived alleles that are very  
418 likely to be deleterious and combine all derived mutations at sites with  $GERP \geq 6$  into the  
419 category “damaging.” We form our “benign” category with all derived mutations with  $GERP \leq 2$ .

420

421  
422  
423

**Table 1. The number of deleterious alleles per megabase partitioned by population and local ancestry background.**

|                                      | AFR<br>( $p = 0.160$ )           | EUR<br>( $p = 0.452$ )           | NAM***<br>( $p = 3.314 \times 10^{-7}$ ) | EUAF**<br>( $p = 1.131 \times 10^{-3}$ ) | EUNA<br>( $p = 0.123$ )          | AFNA**<br>( $p = 4.392 \times 10^{-3}$ ) |
|--------------------------------------|----------------------------------|----------------------------------|------------------------------------------|------------------------------------------|----------------------------------|------------------------------------------|
| AA***<br>( $p < 2 \times 10^{-16}$ ) | 0.335<br>( $1.642 \times 10^6$ ) | 0.284<br>( $1.009 \times 10^5$ ) | 0.237<br>( $8.648 \times 10^2$ )         | 0.311<br>( $7.943 \times 10^5$ )         | 0.280<br>( $2.491 \times 10^4$ ) | 0.315<br>( $8.364 \times 10^4$ )         |
| PR***<br>( $p < 2 \times 10^{-16}$ ) | 0.337<br>( $1.603 \times 10^5$ ) | 0.282<br>( $1.064 \times 10^6$ ) | 0.275<br>( $5.395 \times 10^4$ )         | 0.313<br>( $7.517 \times 10^5$ )         | 0.286<br>( $4.912 \times 10^5$ ) | 0.308<br>( $1.700 \times 10^5$ )         |
| MX***<br>( $p < 2 \times 10^{-16}$ ) | 0.341<br>( $7.651 \times 10^3$ ) | 0.282<br>( $4.585 \times 10^5$ ) | 0.286<br>( $8.275 \times 10^5$ )         | 0.317<br>( $1.154 \times 10^5$ )         | 0.287<br>( $1.142 \times 10^6$ ) | 0.314<br>( $1.393 \times 10^5$ )         |

424 Total number of megabases, summed across all individuals, in parentheses. A significant  
425 difference (Pearson's Chi-squared test, p-value in parentheses) across populations for a given  
426 ancestry background is denoted at the beginning of a column. A significant difference across  
427 ancestry backgrounds for a given population (Pearson's Chi-squared test, p-value in parentheses)  
428 is denoted at the beginning of a row. Population codes: AA - African American, PR - Puerto Rican,  
429 MX - Mexican American. Local ancestry codes: AFR - Homozygous African, EUR - Homozygous  
430 European, NAM - Homozygous Native American, EUAF - Heterozygous European/African, EUNA  
431 - Heterozygous European/Native American, AFNA - Heterozygous African/Native American. \*  $p <$   
432  $0.05$ , \*\*  $p < 0.01$ , \*\*\*  $p < 0.001$ .

433  
434  
435  
436

**Table 2. Regression coefficients inferred for the analyses shown in Fig 4 with p-values in parentheses.**

| ROH<br>Class | $\beta_0$<br>(p-value)                                    | $\beta_1$<br>(p-value)                | $\beta_2$<br>(p-value)                                  | $\beta_3$<br>(p-value)                 |
|--------------|-----------------------------------------------------------|---------------------------------------|---------------------------------------------------------|----------------------------------------|
| All          | *** $3.122 \times 10^{-2}$<br>( $< 2 \times 10^{-16}$ )   | ***1.460<br>( $< 2 \times 10^{-16}$ ) | ***0.180<br>( $< 2 \times 10^{-16}$ )                   | $1.807 \times 10^{-2}$<br>(0.0671)     |
| Long         | $1.059 \times 10^{-3}$<br>(0.508)                         | ***1.429<br>( $< 2 \times 10^{-16}$ ) | *** $5.335 \times 10^{-2}$<br>( $< 2 \times 10^{-16}$ ) | ***0.229<br>( $< 2 \times 10^{-16}$ )  |
| Medium       | *** $8.510 \times 10^{-3}$<br>( $< 3.86 \times 10^{-5}$ ) | ***1.584<br>( $< 2 \times 10^{-16}$ ) | *** $7.012 \times 10^{-2}$<br>( $< 2 \times 10^{-16}$ ) | * $5.695 \times 10^{-2}$<br>(0.0173)   |
| Short        | *** $1.265 \times 10^{-2}$<br>( $4.61 \times 10^{-7}$ )   | ***1.424<br>( $< 2 \times 10^{-16}$ ) | *** $4.810 \times 10^{-2}$<br>( $< 2 \times 10^{-16}$ ) | ***-0.428<br>( $1.10 \times 10^{-8}$ ) |

437  
438

\*  $p < 0.05$ , \*\*  $p < 0.01$ , \*\*\*  $p < 0.001$ .

439  
440  
441

**Table 3. Regression coefficients inferred for the analyses shown in Fig 5 and S1 Fig with p-values in parentheses.**

| ROH Class | Ancestral Haplotype | $\beta_0$<br>(p-value)                                  | $\beta_1$<br>(p-value)                | $\beta_2$<br>(p-value)                                  | $\beta_3$<br>(p-value)                 |
|-----------|---------------------|---------------------------------------------------------|---------------------------------------|---------------------------------------------------------|----------------------------------------|
| All       | NAM                 | *** $3.455 \times 10^{-3}$<br>( $3.18 \times 10^{-4}$ ) | ***1.594<br>( $< 2 \times 10^{-16}$ ) | *** $7.369 \times 10^{-3}$<br>( $5.87 \times 10^{-8}$ ) | ***0.510<br>( $< 2 \times 10^{-16}$ )  |
|           | EUR                 | $-1.205 \times 10^{-3}$<br>(0.2081)                     | ***1.546<br>( $< 2 \times 10^{-16}$ ) | $2.497 \times 10^{-3}$<br>( $6.52 \times 10^{-2}$ )     | ***0.648<br>( $< 2 \times 10^{-16}$ )  |
|           | AFR                 | * $1.308 \times 10^{-3}$<br>( $3.11 \times 10^{-2}$ )   | ***1.743<br>( $< 2 \times 10^{-16}$ ) | $-1.210 \times 10^{-3}$<br>(0.1587)                     | ***1.214<br>( $< 2 \times 10^{-16}$ )  |
| Long      | NAM                 | ** $1.989 \times 10^{-3}$<br>( $3.38 \times 10^{-3}$ )  | ***1.545<br>( $< 2 \times 10^{-16}$ ) | *** $4.192 \times 10^{-3}$<br>( $1.28 \times 10^{-5}$ ) | ***0.604<br>( $< 2 \times 10^{-16}$ )  |
|           | EUR                 | $-3.026 \times 10^{-4}$<br>(0.623)                      | ***1.403<br>( $< 2 \times 10^{-16}$ ) | $1.260 \times 10^{-3}$<br>(0.148)                       | ***0.624<br>( $< 2 \times 10^{-16}$ )  |
|           | AFR                 | $5.324 \times 10^{-4}$<br>(0.286)                       | ***1.610<br>( $< 2 \times 10^{-16}$ ) | $1.134 \times 10^{-4}$<br>(0.872)                       | ***1.265<br>( $< 2 \times 10^{-16}$ )  |
| Medium    | NAM                 | * $1.237 \times 10^{-3}$<br>( $1.661 \times 10^{-2}$ )  | ***1.679<br>( $< 2 \times 10^{-16}$ ) | ** $2.325 \times 10^{-3}$<br>( $1.46 \times 10^{-3}$ )  | ***0.421<br>( $< 2 \times 10^{-16}$ )  |
|           | EUR                 | $-5.614 \times 10^{-4}$<br>(0.340)                      | ***1.651<br>( $< 2 \times 10^{-16}$ ) | $8.918 \times 10^{-4}$<br>(0.284)                       | ***0.684<br>( $< 2 \times 10^{-16}$ )  |
|           | AFR                 | $4.961 \times 10^{-4}$<br>(0.246)                       | ***1.797<br>( $< 2 \times 10^{-16}$ ) | $-1.001 \times 10^{-3}$<br>(0.0979)                     | ***1.217<br>( $< 2 \times 10^{-16}$ )  |
| Short     | NAM                 | $2.711 \times 10^{-4}$<br>(0.259)                       | ***1.594<br>( $< 2 \times 10^{-16}$ ) | ** $1.073 \times 10^{-3}$<br>( $1.61 \times 10^{-3}$ )  | ***0.244<br>( $1.27 \times 10^{-13}$ ) |
|           | EUR                 | $-1.125 \times 10^{-4}$<br>(0.720)                      | ***1.665<br>( $< 2 \times 10^{-16}$ ) | $4.023 \times 10^{-4}$<br>(0.364)                       | ***0.609<br>( $< 2 \times 10^{-16}$ )  |
|           | AFR                 | $2.349 \times 10^{-4}$<br>(0.430)                       | ***1.881<br>( $< 2 \times 10^{-16}$ ) | $-2.568 \times 10^{-4}$<br>(0.542)                      | ***1.116<br>( $< 2 \times 10^{-16}$ )  |

442 \*  $p < 0.05$ , \*\*  $p < 0.01$ , \*\*\*  $p < 0.001$ .

443 **Table 4. Regression coefficients inferred for the analyses shown in Fig 6 and S2 Fig with p-**  
 444 **values in parentheses.**

445

| ROH Class | $\beta_0$<br>(p-value) | $\beta_1$<br>(p-value) | $\beta_2$<br>(p-value) | $\beta_3$<br>(p-value) | $\beta_4$<br>(p-value) | $\beta_5$<br>(p-value) |
|-----------|------------------------|------------------------|------------------------|------------------------|------------------------|------------------------|
|-----------|------------------------|------------------------|------------------------|------------------------|------------------------|------------------------|

|        |     |     |     |     |     |     |
|--------|-----|-----|-----|-----|-----|-----|
| All    | ( ) | ( ) | ( ) | ( ) | ( ) | ( ) |
| Long   | ( ) | ( ) | ( ) | ( ) | ( ) | ( ) |
| Medium | ( ) | ( ) | ( ) | ( ) | ( ) | ( ) |
| Short  | ( ) | ( ) | ( ) | ( ) | ( ) | ( ) |

446  
447

\*  $p < 0.05$ , \*\*  $p < 0.01$ , \*\*\*  $p < 0.001$ .

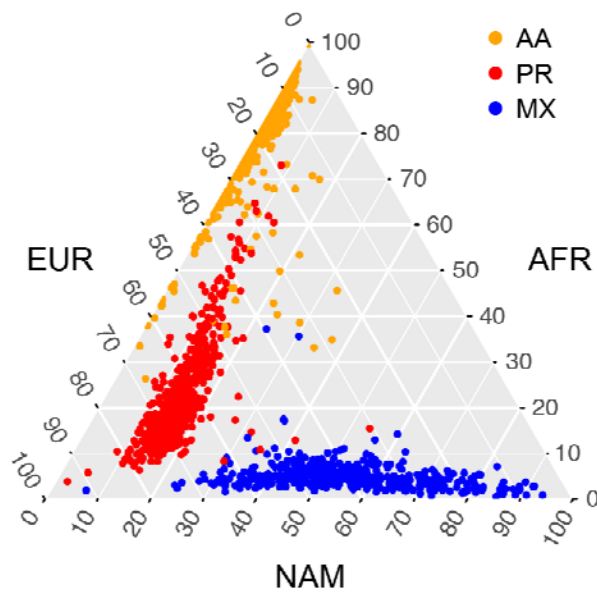

448  
449  
450  
451  
452  
453  
454

**Fig 1. A ternary plot of global ancestry proportions.**

Each point represents a single individual, with their global ancestry proportions shown on each of the three axes (European, EUR; African, AFR; and Native American, NAM). Individuals are colored based on their reported ethnicity, with African Americans (AA) colored orange, Puerto Ricans (PR) colored red, and Mexican Americans (MX) colored blue.

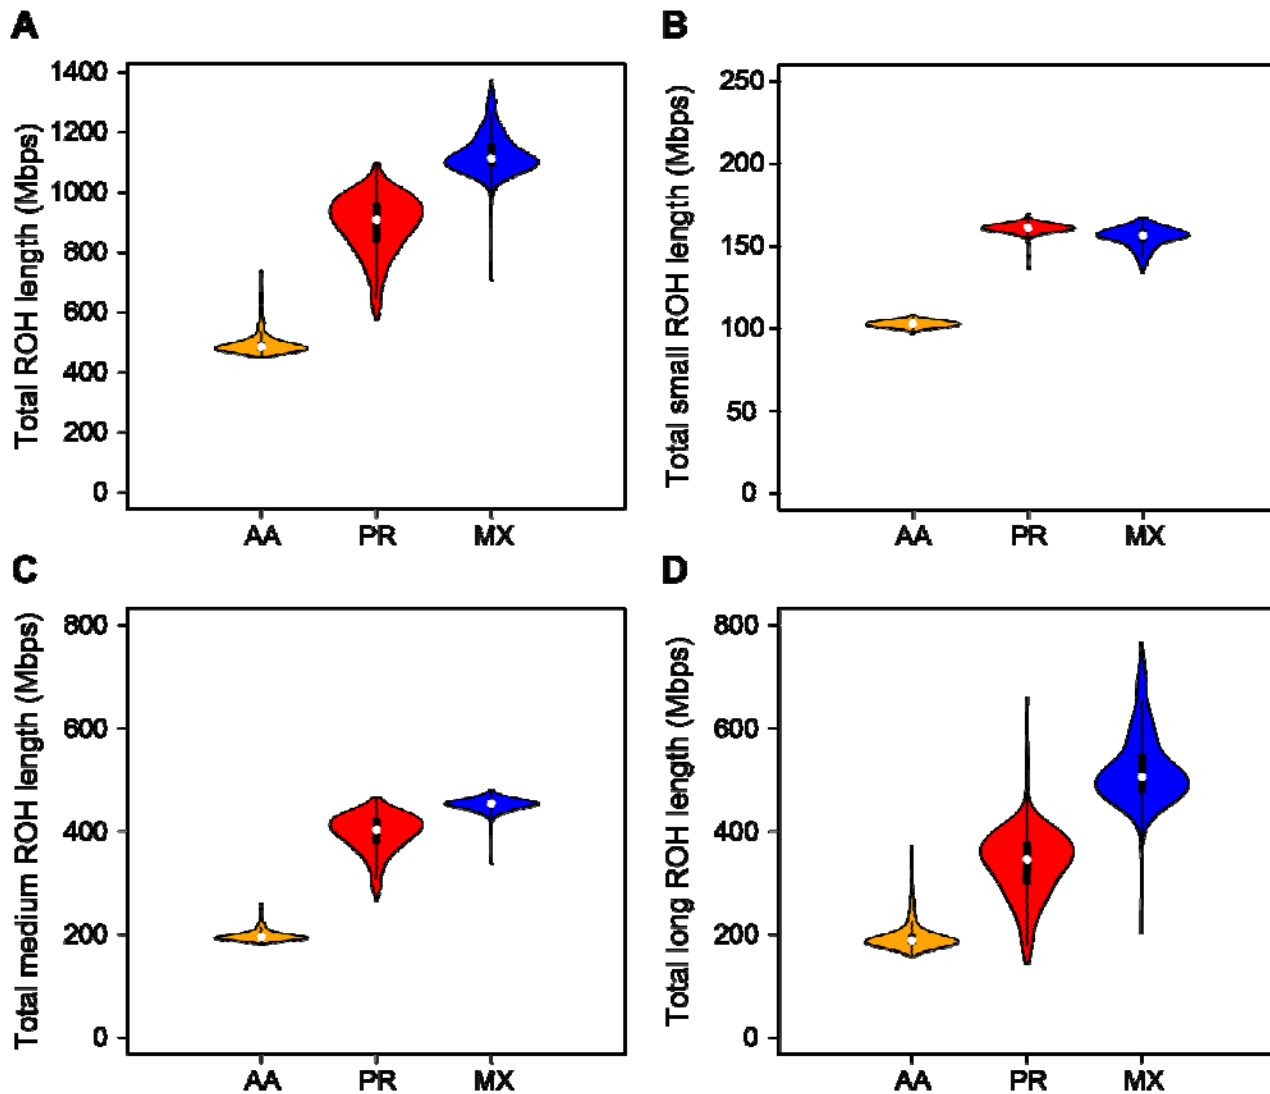

455  
456  
457  
458  
459

**Fig 2. The distribution of summed ROH lengths across size classes.**

(A) all ROH, (B) short ROH, (C) medium ROH, and (D) long ROH. AA – African American, PR – Puerto Rican, MX – Mexican American.

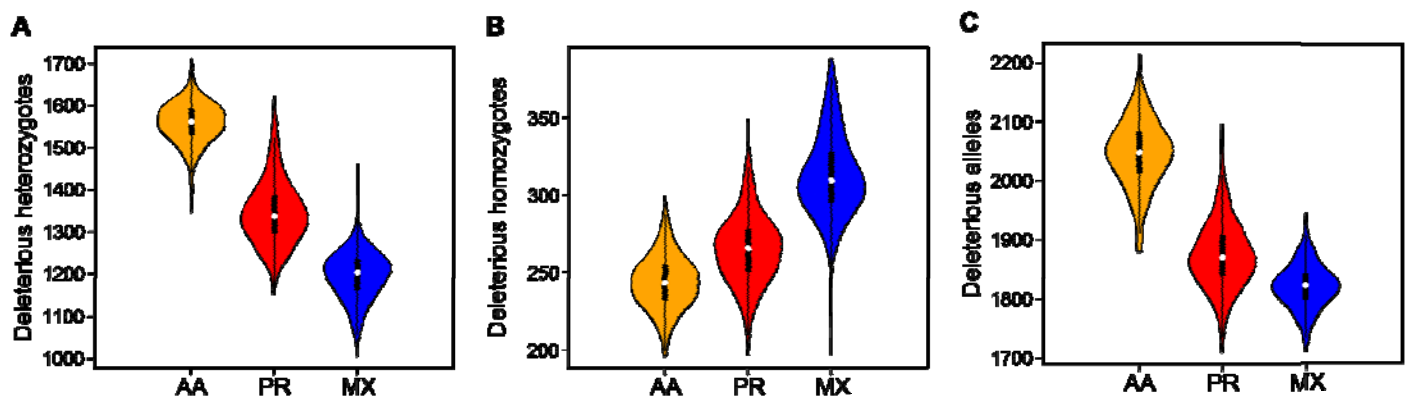

460  
461  
462  
463  
464  
465

**Fig 3. The distribution of deleterious alleles across populations.**

The number of (A) deleterious heterozygotes, (B) deleterious homozygotes, and (C) total deleterious alleles per individual using Polyphen2 classifications. AA – African American, PR – Puerto Rican, MX – Mexican American.

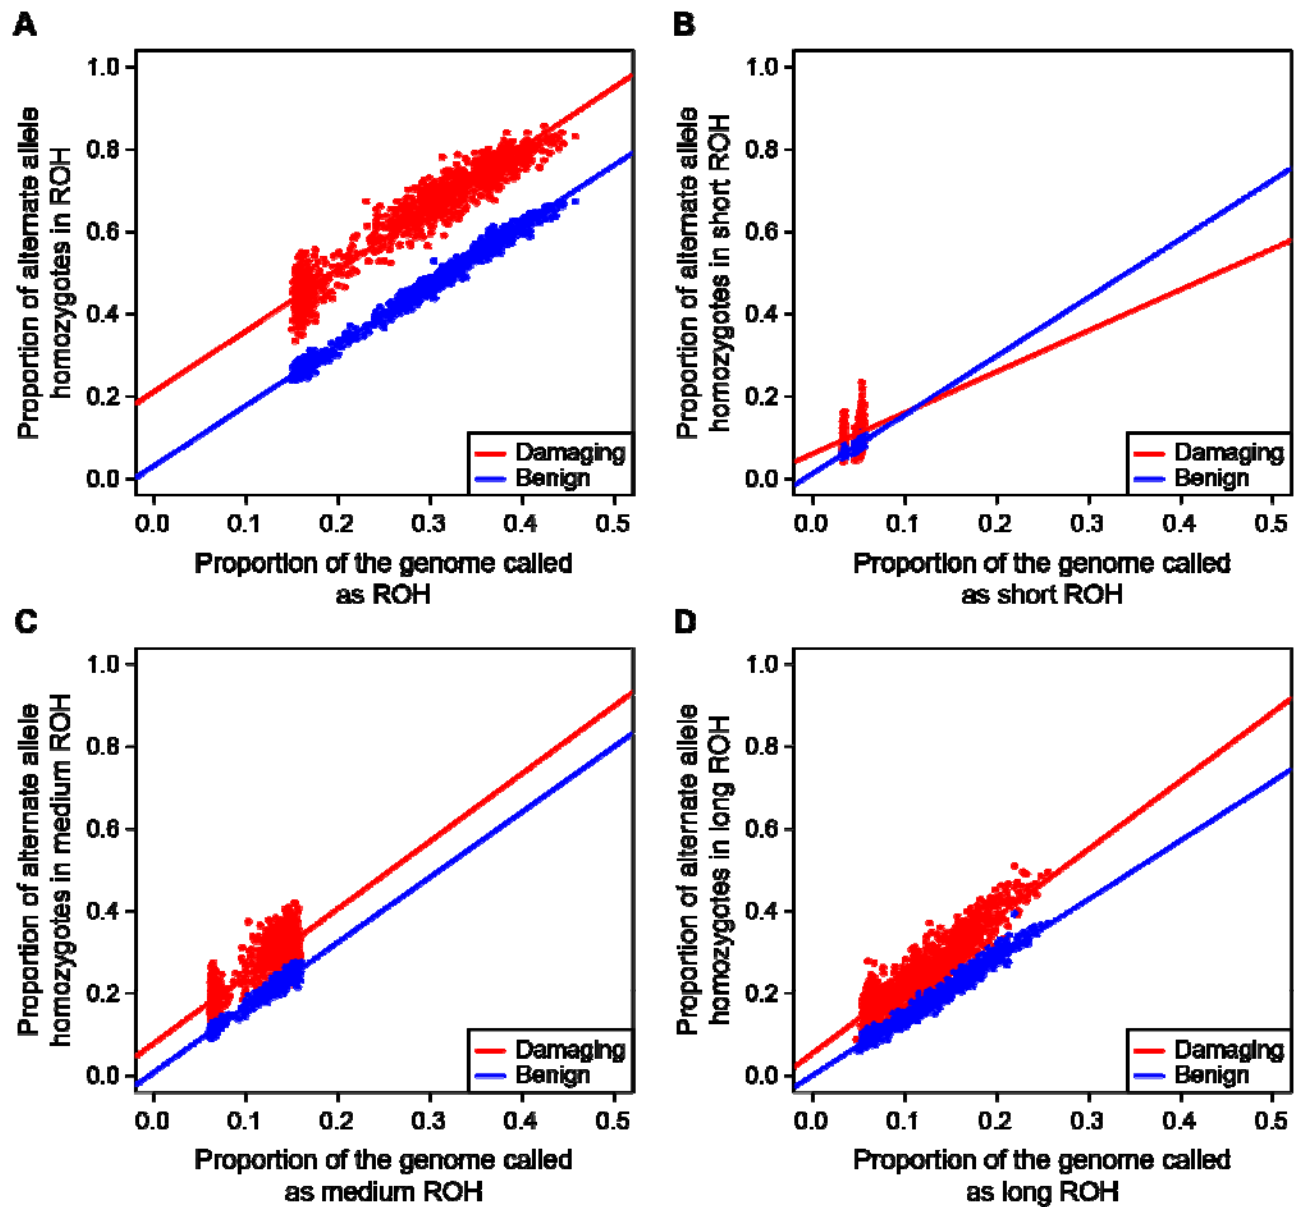

466  
467  
468  
469  
470

**Fig 4. Deleterious and benign homozygotes in ROH classes.**

The proportion of damaging (red) and benign (blue) homozygotes falling in ROH of different size classes: (A) all ROH, (B) short ROH, (C) medium ROH, and (D) long ROH.

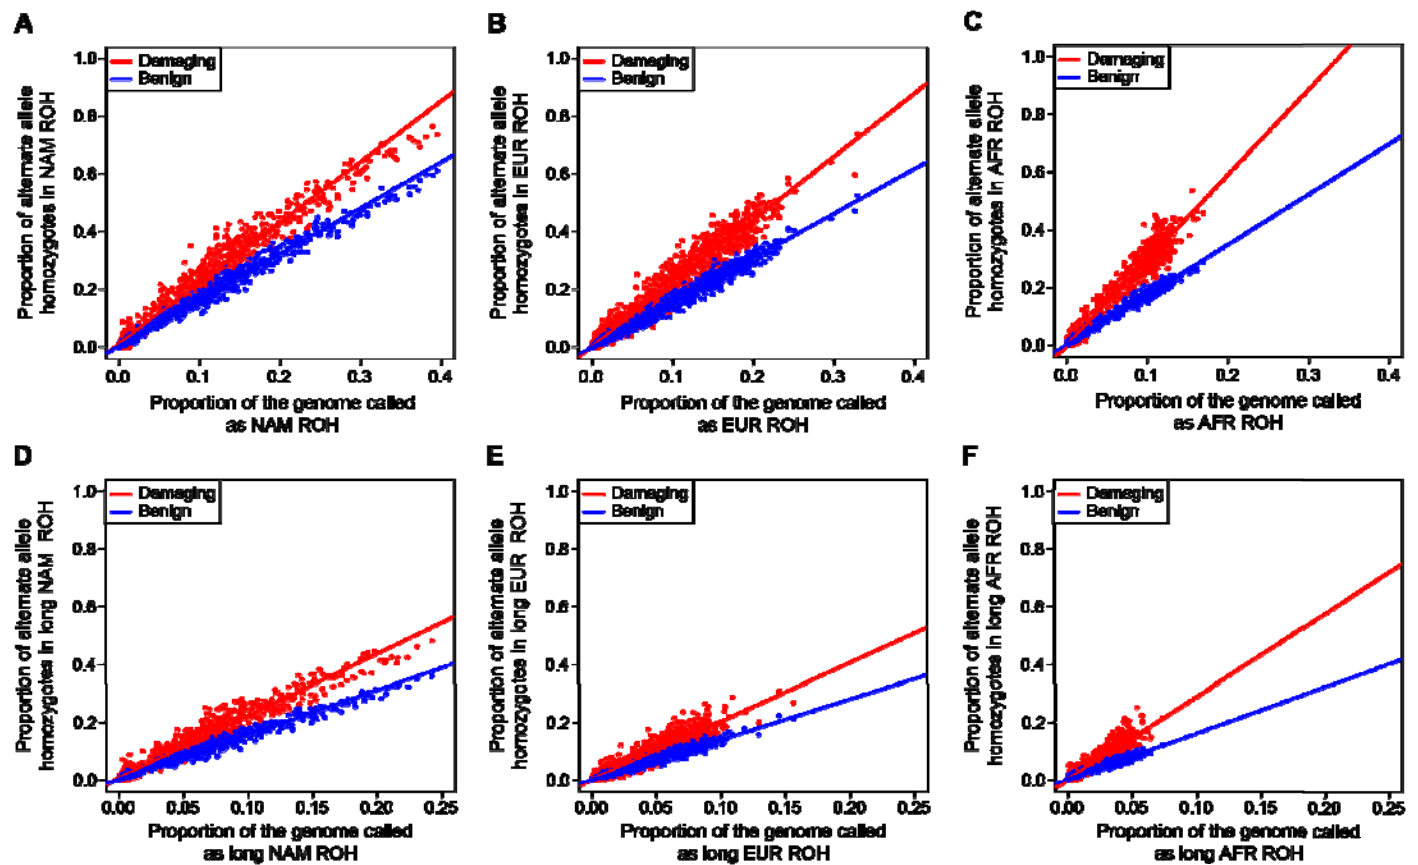

471  
472  
473  
474  
475  
476  
477  
478  
479  
480

**Fig 5. Deleterious and benign homozygotes in ROH classes separated by ancestry.**

The proportion of damaging (red) and benign (blue) homozygotes falling in ROH comprised of different ancestral haplotypes and size classes: (A) all NAM ROH, (B) all EUR ROH, (C) all AFR ROH, (D) long NAM ROH, (E) long EUR ROH, and (F) long AFR ROH. EUR – European, AFR – African, and NAM – Native American.

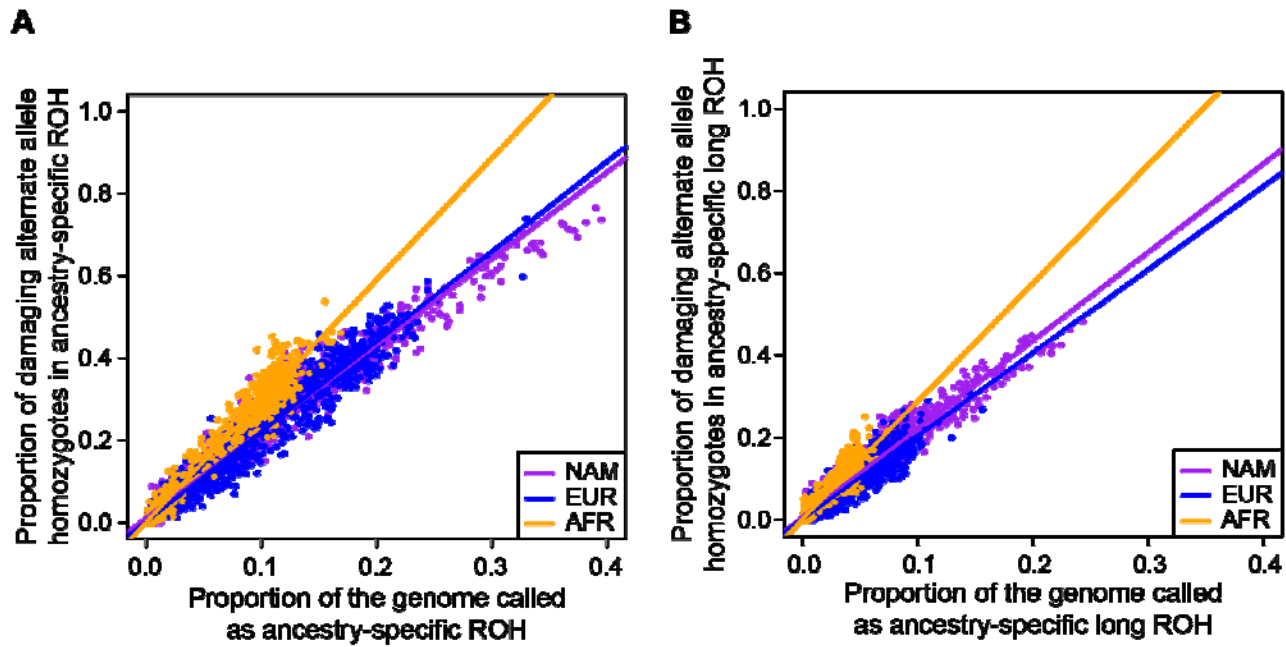

481  
482  
483  
484  
485  
486

**Fig 6. Deleterious homozygotes in ROH classes compared across ancestry.**

A direct comparison of the proportion of damaging homozygotes falling in ROH comprised of different ancestral haplotypes for (A) all ROH and (B) long ROH. EUR – European, colored blue; AFR – African, colored orange; and NAM – Native American, colored purple.

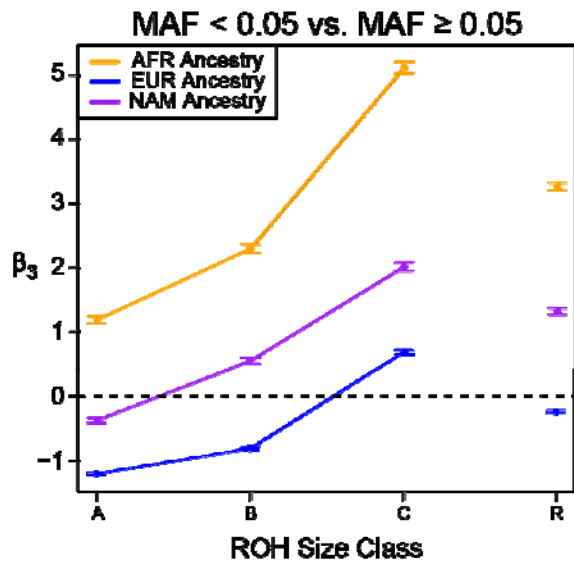

487  
488  
489  
490  
491  
492  
493  
494  
495

**Fig 7. Enrichment of low-frequency variants across ROH sizes.**

The difference in rate of gain of low-frequency minor allele homozygotes ( ) compared to common minor allele homozygotes ( ; from regression analysis). ROH size classes: A – short, B – medium, C – long, R – all sizes. EUR – European, colored blue; AFR – African, colored orange; and NAM – Native American, colored purple. Error bars represent standard error of the regression coefficient.

496  
497



## 498 SUPPORTING INFORMATION

### 499 **S1 Fig. Deleterious versus benign homozygotes by ancestry for medium and small ROH.**

500 The proportion of damaging (red) and benign (blue) homozygotes falling in ROH comprised of  
501 different ancestral haplotypes and size classes: (A) medium NAM ROH, (B) medium EUR ROH,  
502 (C) medium AFR ROH, (D) short NAM ROH, (E) short EUR ROH, and (F) short AFR ROH. EUR –  
503 European, AFR – African, and NAM – Native American.

504

### 505 **S2 Fig. Comparison of deleterious homozygotes between ancestries for medium and small** 506 **ROH.**

507 A direct comparison of the proportion of damaging homozygotes falling in ROH comprised of  
508 different ancestral haplotypes for (A) medium ROH and (B) short ROH. EUR – European, colored  
509 blue; AFR – African, colored orange; and NAM – Native American, colored purple.

510

### 511 **S3 Fig. Regression coefficients for analyses with other deleteriousness classifications.**

512 The difference in slopes ( $\beta_3$  coefficients) between deleterious and benign categories across ROH  
513 size classes from re-analyses of the data using different deleteriousness classification schemes.  
514 (A) SIFT, (B) Provean, (C) GERP, (D) SIFT only with derived alleles, (E) Provean only with  
515 derived alleles, (F) Polyphen 2 only with derived alleles. ROH size classes: A – short, B –  
516 medium, C – long, R – all sizes. EUR – European, colored blue; AFR – African, colored orange;  
517 and NAM – Native American, colored purple.

518

### 519 **S4 Fig. Replication of findings using 1000 genomes data.**

520 The identical analysis from Fig 4A-C except using the six admixed populations from the 1000  
521 Genomes Project and CADD scores. (A) Native American ancestry, (B) European Ancestry, (C)  
522 African Ancestry.

523

### 524 **S5 Fig. The distribution of polarized Polyphen2 deleterious alleles across populations.**

525 The number of (A) deleterious heterozygotes, (B) deleterious homozygotes, and (C) total  
526 deleterious alleles per individual using polarized Polyphen2 classifications. AA – African  
527 American, PR – Puerto Rican, MX – Mexican American.

528

### 529 **S6 Fig. The distribution of SIFT deleterious alleles across populations.**

530 The number of (A) deleterious heterozygotes, (B) deleterious homozygotes, and (C) total  
531 deleterious alleles per individual using SIFT classifications. AA – African American, PR – Puerto  
532 Rican, MX – Mexican American.

533

### 534 **S7 Fig. The distribution of polarized SIFT deleterious alleles across populations.**

535 The number of (A) deleterious heterozygotes, (B) deleterious homozygotes, and (C) total  
536 deleterious alleles per individual using polarized SIFT classifications. AA – African American, PR –  
537 Puerto Rican, MX – Mexican American.

538

### 539 **S8 Fig. The distribution of Provean deleterious alleles across populations.**

540 The number of (A) deleterious heterozygotes, (B) deleterious homozygotes, and (C) total  
541 deleterious alleles per individual using Provean classifications. AA – African American, PR –  
542 Puerto Rican, MX – Mexican American.

543

### 544 **S9 Fig. The distribution of polarized Provean deleterious alleles across populations.**

545 The number of (A) deleterious heterozygotes, (B) deleterious homozygotes, and (C) total  
546 deleterious alleles per individual using polarized Provean classifications. AA – African American,  
547 PR – Puerto Rican, MX – Mexican American.

548

549 **S10 Fig. The distribution of GERP deleterious alleles across populations.**

550 The number of (A) deleterious heterozygotes, (B) deleterious homozygotes, and (C) total  
551 deleterious alleles per individual using GERP classifications. AA – African American, PR – Puerto  
552 Rican, MX – Mexican American.

553

554 **S1 Text. Processing of 1000 genomes data.**

555

## 556 **References**

- 557 1. Ceballos FC, Joshi PK, Clark DW, Ramsay M, Wilson JF. Runs of homozygosity: windows into  
558 population history and trait architecture. *Nature Reviews Genetics*. 2018.
- 559 2. Broman KW, Weber JL. Long homozygous chromosomal segments in reference families from  
560 the centre d'Etude du polymorphisme humain. *Am J Hum Genet*. 1999;65(6):1493-500. Epub  
561 1999/12/01. doi: 10.1086/302661. PubMed PMID: 10577902; PubMed Central PMCID:  
562 PMCPMC1288359.
- 563 3. Gibson J, Morton NE, Collins A. Extended tracts of homozygosity in outbred human  
564 populations. *Hum Mol Genet*. 2006;15(5):789-95. Epub 2006/01/27. doi: 10.1093/hmg/ddi493.  
565 PubMed PMID: 16436455.
- 566 4. McQuillan R, Leutenegger AL, Abdel-Rahman R, Franklin CS, Pericic M, Barac-Lauc L, et al. Runs  
567 of homozygosity in European populations. *Am J Hum Genet*. 2008;83(3):359-72. Epub 2008/09/02.  
568 doi: 10.1016/j.ajhg.2008.08.007. PubMed PMID: 18760389; PubMed Central PMCID:  
569 PMCPMC2556426.
- 570 5. Kirin M, McQuillan R, Franklin CS, Campbell H, McKeigue PM, Wilson JF. Genomic runs of  
571 homozygosity record population history and consanguinity. *PLoS One*. 2010;5(11):e13996. Epub  
572 2010/11/19. doi: 10.1371/journal.pone.0013996. PubMed PMID: 21085596; PubMed Central PMCID:  
573 PMCPMC2981575.
- 574 6. Nothnagel M, Lu TT, Kayser M, Krawczak M. Genomic and geographic distribution of SNP-  
575 defined runs of homozygosity in Europeans. *Hum Mol Genet*. 2010;19(15):2927-35. Epub  
576 2010/05/14. doi: 10.1093/hmg/ddq198. PubMed PMID: 20462934.
- 577 7. Pemberton TJ, Absher D, Feldman MW, Myers RM, Rosenberg NA, Li JZ. Genomic patterns of  
578 homozygosity in worldwide human populations. *Am J Hum Genet*. 2012;91(2):275-92. Epub  
579 2012/08/14. doi: 10.1016/j.ajhg.2012.06.014. PubMed PMID: 22883143; PubMed Central PMCID:  
580 PMCPMC3415543.
- 581 8. Blant A, Kwong M, Szpiech ZA, Pemberton TJ. Weighted likelihood inference of genomic  
582 autozygosity patterns in dense genotype data. *BMC Genomics*. 2017;18(1):928. Epub 2017/12/02.  
583 doi: 10.1186/s12864-017-4312-3. PubMed PMID: 29191164; PubMed Central PMCID:  
584 PMCPMC5709839.
- 585 9. Ben Halim N, Nagara M, Regnault B, Hsouna S, Lasram K, Kefi R, et al. Estimation of Recent and  
586 Ancient Inbreeding in a Small Endogamous Tunisian Community Through Genomic Runs of  
587 Homozygosity. *Annals of Human Genetics*. 2015;79(6):402-17. doi: 10.1111/ahg.12131. PubMed  
588 PMID: WOS:000365399000003.
- 589 10. Kardos M, Luikart G, Allendorf FW. Measuring individual inbreeding in the age of genomics:  
590 marker-based measures are better than pedigrees. *Heredity (Edinb)*. 2015;115(1):63-72. Epub  
591 2015/06/11. doi: 10.1038/hdy.2015.17. PubMed PMID: 26059970; PubMed Central PMCID:  
592 PMCPMC4815495.

- 593 11. Mastrangelo S, Tolone M, Di Gerlando R, Fontanesi L, Sardina MT, Portolano B. Genomic  
594 inbreeding estimation in small populations: evaluation of runs of homozygosity in three local dairy  
595 cattle breeds. *Animal*. 2016;10(5):746-54. doi: 10.1017/S1751731115002943. PubMed PMID:  
596 WOS:000377125600003.
- 597 12. Kang JTL, Goldberg A, Edge MD, Behar DM, Rosenberg NA. Consanguinity Rates Predict Long  
598 Runs of Homozygosity in Jewish Populations. *Hum Hered*. 2016;82(3-4):87-102. Epub 2017/09/15.  
599 doi: 10.1159/000478897. PubMed PMID: 28910803; PubMed Central PMCID: PMC5698150.
- 600 13. Meyer M, Kircher M, Gansauge MT, Li H, Racimo F, Mallick S, et al. A High-Coverage Genome  
601 Sequence from an Archaic Denisovan Individual. *Science*. 2012;338(6104):222-6. doi:  
602 10.1126/science.1224344. PubMed PMID: WOS:000309712300037.
- 603 14. Castellano S, Parra G, Sanchez-Quinto FA, Racimo F, Kuhlwilm M, Kircher M, et al. Patterns of  
604 coding variation in the complete exomes of three Neandertals. *P Natl Acad Sci USA*.  
605 2014;111(18):6666-71. doi: 10.1073/pnas.1405138111. PubMed PMID: WOS:000335477300045.
- 606 15. Prufer K, Racimo F, Patterson N, Jay F, Sankararaman S, Sawyer S, et al. The complete genome  
607 sequence of a Neanderthal from the Altai Mountains. *Nature*. 2014;505(7481):43-+. doi:  
608 10.1038/nature12886. PubMed PMID: WOS:000329163300020.
- 609 16. Gamba C, Jones ER, Teasdale MD, McLaughlin RL, Gonzalez-Fortes G, Mattiangeli V, et al.  
610 Genome flux and stasis in a five millennium transect of European prehistory. *Nature Communications*.  
611 2014;5. doi: ARTN 5257  
612 10.1038/ncomms6257. PubMed PMID: WOS:000343985400006.
- 613 17. Prado-Martinez J, Sudmant PH, Kidd JM, Li H, Kelley JL, Lorente-Galdos B, et al. Great ape  
614 genetic diversity and population history. *Nature*. 2013;499(7459):471-5. doi: 10.1038/nature12228.  
615 PubMed PMID: WOS:000322157900039.
- 616 18. Xue YL, Prado-Martinez J, Sudmant PH, Narasimhan V, Ayub Q, Szpak M, et al. Mountain gorilla  
617 genomes reveal the impact of long-term population decline and inbreeding. *Science*.  
618 2015;348(6231):242-5. doi: 10.1126/science.aaa3952. PubMed PMID: WOS:000352613700048.
- 619 19. Palkopoulou E, Mallick S, Skoglund P, Enk J, Rohland N, Li H, et al. Complete Genomes Reveal  
620 Signatures of Demographic and Genetic Declines in the Woolly Mammoth. *Current Biology*.  
621 2015;25(10):1395-400. doi: 10.1016/j.cub.2015.04.007. PubMed PMID: WOS:000354785900035.
- 622 20. Curik I, Ferencakovic M, Solkner J. Inbreeding and runs of homozygosity: A possible solution to  
623 an old problem. *Livest Sci*. 2014;166:26-34. doi: 10.1016/j.livsci.2014.05.034. PubMed PMID:  
624 WOS:000340994000005.
- 625 21. Zhang Q, Guldbbrandtsen B, Bosse M, Lund MS, Sahana G. Runs of homozygosity and  
626 distribution of functional variants in the cattle genome. *BMC Genomics*. 2015;16:542. Epub  
627 2015/07/23. doi: 10.1186/s12864-015-1715-x. PubMed PMID: 26198692; PubMed Central PMCID:  
628 PMC4508970.
- 629 22. Howard JT, Tiezzi F, Huang Y, Gray KA, Maltecca C. Characterization and management of long  
630 runs of homozygosity in parental nucleus lines and their associated crossbred progeny. *Genet Sel*  
631 *Evol*. 2016;48. doi: ARTN 91  
632 10.1186/s12711-016-0269-y. PubMed PMID: WOS:000388541600002.
- 633 23. Manunza A, Noce A, Serradilla JM, Goyache F, Martinez A, Capote J, et al. A genome-wide  
634 perspective about the diversity and demographic history of seven Spanish goat breeds. *Genet Sel Evol*.  
635 2016;48. doi: ARTN 52  
636 10.1186/s12711-016-0229-6. PubMed PMID: WOS:000381071000001.
- 637 24. Gurgul A, Szmatola T, Topolski P, Jasielczuk I, Zukowski K, Bugno-Poniewierska M. The use of  
638 runs of homozygosity for estimation of recent inbreeding in Holstein cattle. *J Appl Genet*.  
639 2016;57(4):527-30. doi: 10.1007/s13353-016-0337-6. PubMed PMID: WOS:000385423900013.

- 640 25. Peripolli E, Stafuzza NB, Munari DP, Lima ALF, Irgang R, Machado MA, et al. Assessment of runs  
641 of homozygosity islands and estimates of genomic inbreeding in Gyr (*Bos indicus*) dairy cattle. *Bmc*  
642 *Genomics*. 2018;19. doi: ARTN 34  
643 10.1186/s12864-017-4365-3. PubMed PMID: WOS:000419680000001.
- 644 26. Forutan M, Mahyari SA, Baes C, Melzer N, Schenkel FS, Sargolzaei M. Inbreeding and runs of  
645 homozygosity before and after genomic selection in North American Holstein cattle. *Bmc Genomics*.  
646 2018;19. doi: ARTN 98  
647 10.1186/s12864-018-4453-z. PubMed PMID: WOS:000423444300001.
- 648 27. Kardos M, Qvarnstrom A, Ellegren H. Inferring Individual Inbreeding and Demographic History  
649 from Segments of Identity by Descent in *Ficedula Flycatcher* Genome Sequences. *Genetics*.  
650 2017;205(3):1319-34. doi: 10.1534/genetics.116.198861. PubMed PMID: WOS:000395807200022.
- 651 28. Bortoluzzi C, Crooijmans R, Bosse M, Hiemstra SJ, Groenen MAM, Megens HJ. The effects of  
652 recent changes in breeding preferences on maintaining traditional Dutch chicken genomic diversity.  
653 *Heredity (Edinb)*. 2018. Epub 2018/03/29. doi: 10.1038/s41437-018-0072-3. PubMed PMID:  
654 29588508.
- 655 29. Bertolini F, Gandolfi B, Kim ES, Haase B, Lyons LA, Rothschild MF. Evidence of selection  
656 signatures that shape the Persian cat breed. *Mamm Genome*. 2016;27(3-4):144-55. doi:  
657 10.1007/s00335-016-9623-1. PubMed PMID: WOS:000373308200005.
- 658 30. Boyko AR, Quignon P, Li L, Schoenebeck JJ, Degenhardt JD, Lohmueller KE, et al. A Simple  
659 Genetic Architecture Underlies Morphological Variation in Dogs. *Plos Biol*. 2010;8(8). doi: ARTN  
660 e1000451  
661 10.1371/journal.pbio.1000451. PubMed PMID: WOS:000281464500009.
- 662 31. vonHoldt BM, Pollinger JP, Earl DA, Knowles JC, Boyko AR, Parker H, et al. A genome-wide  
663 perspective on the evolutionary history of enigmatic wolf-like canids. *Genome Research*.  
664 2011;21(8):1294-305. doi: 10.1101/gr.116301.110. PubMed PMID: WOS:000293335700009.
- 665 32. Pilot M, Dabrowski MJ, Hayrapetyan V, Yavruyan EG, Kopaliani N, Tsingarska E, et al. Genetic  
666 Variability of the Grey Wolf *Canis lupus* in the Caucasus in Comparison with Europe and the Middle  
667 East: Distinct or Intermediary Population? *Plos One*. 2014;9(4). doi: ARTN e93828  
668 10.1371/journal.pone.0093828. PubMed PMID: WOS:000334160900054.
- 669 33. Friedenbergs SG, Meurs KM, Mackay TFC. Evaluation of artificial selection in Standard Poodles  
670 using whole-genome sequencing. *Mamm Genome*. 2016;27(11-12):599-609. doi: 10.1007/s00335-  
671 016-9660-9. PubMed PMID: WOS:000388682800007.
- 672 34. Metzger J, Pfahler S, Distl O. Variant detection and runs of homozygosity in next generation  
673 sequencing data elucidate the genetic background of Lundehund syndrome. *Bmc Genomics*. 2016;17.  
674 doi: ARTN 535  
675 10.1186/s12864-016-2844-6. PubMed PMID: WOS:000381222500003.
- 676 35. Pedersen NC, Pooch AS, Liu H. A genetic assessment of the English bulldog. *Canine genetics and*  
677 *epidemiology*. 2016;3(1):6.
- 678 36. Dreger DL, Davis BW, Cocco R, Sechi S, Di Cerbo A, Parker HG, et al. Commonalities in  
679 Development of Pure Breeds and Population Isolates Revealed in the Genome of the Sardinian Foini's  
680 Dog. *Genetics*. 2016;204(2):737-55. doi: 10.1534/genetics.116.192427. PubMed PMID:  
681 WOS:000385871400028.
- 682 37. Wiener P, Sanchez-Molano E, Clements DN, Woolliams JA, Haskell MJ, Blott SC. Genomic data  
683 illuminates demography, genetic structure and selection of a popular dog breed. *Bmc Genomics*.  
684 2017;18. doi: ARTN 609  
685 10.1186/s12864-017-3933-x. PubMed PMID: WOS:000408036300001.
- 686 38. Sams AJ, Boyko AR. Fine-scale resolution and analysis of runs of homozygosity in domestic  
687 dogs. *bioRxiv*. 2018. doi: 10.1101/315770.

- 688 39. Kardos M, Akesson M, Fountain T, Flagstad O, Liberg O, Olason P, et al. Genomic consequences  
689 of intensive inbreeding in an isolated wolf population. *Nat Ecol Evol.* 2018;2(1):124-31. Epub  
690 2017/11/22. doi: 10.1038/s41559-017-0375-4. PubMed PMID: 29158554.
- 691 40. Johnson EC, Evans LM, Keller MC. Relationships between estimated autozygosity and complex  
692 traits in the UK Biobank. *bioRxiv.* 2018. doi: 10.1101/291872.
- 693 41. Sheridan E, Wright J, Small N, Corry PC, Oddie S, Whibley C, et al. Risk factors for congenital  
694 anomaly in a multiethnic birth cohort: an analysis of the Born in Bradford study. *Lancet.*  
695 2013;382(9901):1350-9. Epub 2013/07/09. doi: 10.1016/S0140-6736(13)61132-0. PubMed PMID:  
696 23830354.
- 697 42. Bittles AH. Consanguineous marriages and congenital anomalies. *Lancet.*  
698 2013;382(9901):1316-7. Epub 2013/07/09. doi: 10.1016/S0140-6736(13)61503-2. PubMed PMID:  
699 23830356.
- 700 43. Scott EM, Halees A, Itan Y, Spencer EG, He Y, Azab MA, et al. Characterization of Greater Middle  
701 Eastern genetic variation for enhanced disease gene discovery. *Nat Genet.* 2016;48(9):1071-6. Epub  
702 2016/07/19. doi: 10.1038/ng.3592. PubMed PMID: 27428751; PubMed Central PMCID:  
703 PMC5019950.
- 704 44. Shami SA, Qaisar R, Bittles AH. Consanguinity and adult morbidity in Pakistan. *Lancet.*  
705 1991;338(8772):954. Epub 1991/10/12. PubMed PMID: 1681304.
- 706 45. Puzyrev VP, Lemza SV, Nazarenko LP, Panphilov VI. Influence of genetic and demographic  
707 factors on etiology and pathogenesis of chronic disease in north Siberian aborigines. *Arctic Med Res.*  
708 1992;51(3):136-42. Epub 1992/07/01. PubMed PMID: 1503580.
- 709 46. Ismail J, Jafar TH, Jafary FH, White F, Faruqui AM, Chaturvedi N. Risk factors for non-fatal  
710 myocardial infarction in young South Asian adults. *Heart.* 2004;90(3):259-63. Epub 2004/02/18.  
711 PubMed PMID: 14966040; PubMed Central PMCID: PMC1768096.
- 712 47. Christofidou P, Nelson CP, Nikpay M, Qu L, Li M, Loley C, et al. Runs of Homozygosity:  
713 Association with Coronary Artery Disease and Gene Expression in Monocytes and Macrophages. *Am J*  
714 *Hum Genet.* 2015;97(2):228-37. Epub 2015/07/15. doi: 10.1016/j.ajhg.2015.06.001. PubMed PMID:  
715 26166477; PubMed Central PMCID: PMC4573243.
- 716 48. Simpson JL, Martin AO, Elias S, Sarto GE, Dunn JK. Cancers of the breast and female genital  
717 system: search for recessive genetic factors through analysis of human isolate. *Am J Obstet Gynecol.*  
718 1981;141(6):629-36. Epub 1981/11/15. PubMed PMID: 7315892.
- 719 49. Lebel RR, Gallagher WB. Wisconsin consanguinity studies. II: Familial adenocarcinomatosis.  
720 *Am J Med Genet.* 1989;33(1):1-6. Epub 1989/05/01. doi: 10.1002/ajmg.1320330102. PubMed PMID:  
721 2750776.
- 722 50. Rudan I. Inbreeding and cancer incidence in human isolates. *Hum Biol.* 1999;71(2):173-87.  
723 Epub 1999/05/01. PubMed PMID: 10222641.
- 724 51. Bacolod MD, Schemmann GS, Wang S, Shattock R, Giardina SF, Zeng Z, et al. The signatures of  
725 autozygosity among patients with colorectal cancer. *Cancer Res.* 2008;68(8):2610-21. Epub  
726 2008/04/01. doi: 10.1158/0008-5472.CAN-07-5250. PubMed PMID: 18375840; PubMed Central  
727 PMCID: PMC4383032.
- 728 52. Ujvari B, Klaassen M, Raven N, Russell T, Vittecoq M, Hamede R, et al. Genetic diversity,  
729 inbreeding and cancer. *Proc Biol Sci.* 2018;285(1875). Epub 2018/03/23. doi:  
730 10.1098/rspb.2017.2589. PubMed PMID: 29563261; PubMed Central PMCID: PMC5897632.
- 731 53. Krieger H. Inbreeding effects on metrical traits in Northeastern Brazil. *Am J Hum Genet.*  
732 1969;21(6):537-46. Epub 1969/11/01. PubMed PMID: 5365755; PubMed Central PMCID:  
733 PMC1706491.
- 734 54. Hurwich BJ, Nubani N. Blood pressures in a highly inbred community--Abu Ghosh, Israel. 1.  
735 Original survey. *Isr J Med Sci.* 1978;14(9):962-9. Epub 1978/09/01. PubMed PMID: 721424.

- 736 55. Saleh EA, Mahfouz AA, Tayel KY, Naguib MK, Bin-al-Shaikh NM. Hypertension and its  
737 determinants among primary-school children in Kuwait: an epidemiological study. *East Mediterr*  
738 *Health J.* 2000;6(2-3):333-7. Epub 2001/09/15. PubMed PMID: 11556020.
- 739 56. Rudan I, Smolej-Narancic N, Campbell H, Carothers A, Wright A, Janicijevic B, et al. Inbreeding  
740 and the genetic complexity of human hypertension. *Genetics.* 2003;163(3):1011-21. Epub  
741 2003/03/29. PubMed PMID: 12663539; PubMed Central PMCID: PMCPMC1462484.
- 742 57. Campbell H, Carothers AD, Rudan I, Hayward C, Biloglav Z, Barac L, et al. Effects of genome-  
743 wide heterozygosity on a range of biomedically relevant human quantitative traits. *Hum Mol Genet.*  
744 2007;16(2):233-41. Epub 2007/01/16. doi: 10.1093/hmg/ddl473. PubMed PMID: 17220173.
- 745 58. Keller MC, Miller G. Resolving the paradox of common, harmful, heritable mental disorders:  
746 which evolutionary genetic models work best? *Behav Brain Sci.* 2006;29(4):385-404; discussion 5-52.  
747 Epub 2006/11/11. doi: 10.1017/S0140525X06009095. PubMed PMID: 17094843.
- 748 59. Keller MC, Simonson MA, Ripke S, Neale BM, Gejman PV, Howrigan DP, et al. Runs of  
749 homozygosity implicate autozygosity as a schizophrenia risk factor. *PLoS Genet.* 2012;8(4):e1002656.  
750 Epub 2012/04/19. doi: 10.1371/journal.pgen.1002656. PubMed PMID: 22511889; PubMed Central  
751 PMCID: PMCPMC3325203.
- 752 60. Gandin I, Faletra F, Faletra F, Carella M, Pecile V, Ferrero GB, et al. Excess of runs of  
753 homozygosity is associated with severe cognitive impairment in intellectual disability. *Genet Med.*  
754 2015;17(5):396-9. Epub 2014/09/19. doi: 10.1038/gim.2014.118. PubMed PMID: 25232855.
- 755 61. Mukherjee S, Guha S, Ikeda M, Iwata N, Malhotra AK, Pe'er I, et al. Excess of homozygosity in  
756 the major histocompatibility complex in schizophrenia. *Hum Mol Genet.* 2014;23(22):6088-95. Epub  
757 2014/06/20. doi: 10.1093/hmg/ddu308. PubMed PMID: 24943592; PubMed Central PMCID:  
758 PMCPMC4204767.
- 759 62. Iourov IY, Vorsanova SG, Korostelev SA, Zelenova MA, Yurov YB. Long contiguous stretches of  
760 homozygosity spanning shortly the imprinted loci are associated with intellectual disability, autism  
761 and/or epilepsy. *Mol Cytogenet.* 2015;8:77. Epub 2015/10/20. doi: 10.1186/s13039-015-0182-z.  
762 PubMed PMID: 26478745; PubMed Central PMCID: PMCPMC4608298.
- 763 63. Ghani M, Reitz C, Cheng R, Vardarajan BN, Jun G, Sato C, et al. Association of Long Runs of  
764 Homozygosity With Alzheimer Disease Among African American Individuals. *JAMA Neurol.*  
765 2015;72(11):1313-23. Epub 2015/09/15. doi: 10.1001/jamaneurol.2015.1700. PubMed PMID:  
766 26366463; PubMed Central PMCID: PMCPMC4641052.
- 767 64. McQuillan R, Eklund N, Pirastu N, Kuningas M, McEvoy BP, Esko T, et al. Evidence of inbreeding  
768 depression on human height. *PLoS Genet.* 2012;8(7):e1002655. Epub 2012/07/26. doi:  
769 10.1371/journal.pgen.1002655. PubMed PMID: 22829771; PubMed Central PMCID:  
770 PMCPMC3400549.
- 771 65. Joshi PK, Esko T, Mattsson H, Eklund N, Gandin I, Nutile T, et al. Directional dominance on  
772 stature and cognition in diverse human populations. *Nature.* 2015;523(7561):459-62. Epub  
773 2015/07/02. doi: 10.1038/nature14618. PubMed PMID: 26131930; PubMed Central PMCID:  
774 PMCPMC4516141.
- 775 66. Lyons EJ, Frodsham AJ, Zhang L, Hill AV, Amos W. Consanguinity and susceptibility to  
776 infectious diseases in humans. *Biol Lett.* 2009;5(4):574-6. Epub 2009/03/28. doi:  
777 10.1098/rsbl.2009.0133. PubMed PMID: 19324620; PubMed Central PMCID: PMCPMC2684220.
- 778 67. Pritchard JK. Are rare variants responsible for susceptibility to complex diseases? *Am J Hum*  
779 *Genet.* 2001;69(1):124-37. Epub 2001/06/19. doi: 10.1086/321272. PubMed PMID: 11404818;  
780 PubMed Central PMCID: PMCPMC1226027.
- 781 68. Pritchard JK, Cox NJ. The allelic architecture of human disease genes: common disease-  
782 common variant...or not? *Hum Mol Genet.* 2002;11(20):2417-23. Epub 2002/09/28. PubMed PMID:  
783 12351577.

- 784 69. Carlson CS, Eberle MA, Kruglyak L, Nickerson DA. Mapping complex disease loci in whole-  
785 genome association studies. *Nature*. 2004;429(6990):446-52. Epub 2004/05/28. doi:  
786 10.1038/nature02623. PubMed PMID: 15164069.
- 787 70. Freimer N, Sabatti C. The use of pedigree, sib-pair and association studies of common diseases  
788 for genetic mapping and epidemiology. *Nat Genet*. 2004;36(10):1045-51. Epub 2004/09/30. doi:  
789 10.1038/ng1433. PubMed PMID: 15454942.
- 790 71. Boyle EA, Li YI, Pritchard JK. An Expanded View of Complex Traits: From Polygenic to  
791 Omnigenic. *Cell*. 2017;169(7):1177-86. Epub 2017/06/18. doi: 10.1016/j.cell.2017.05.038. PubMed  
792 PMID: 28622505; PubMed Central PMCID: PMC5536862.
- 793 72. Reich DE, Lander ES. On the allelic spectrum of human disease. *Trends Genet*. 2001;17(9):502-  
794 10. Epub 2001/08/30. PubMed PMID: 11525833.
- 795 73. Szpiech ZA, Xu J, Pemberton TJ, Peng W, Zollner S, Rosenberg NA, et al. Long runs of  
796 homozygosity are enriched for deleterious variation. *Am J Hum Genet*. 2013;93(1):90-102. Epub  
797 2013/06/12. doi: 10.1016/j.ajhg.2013.05.003. PubMed PMID: 23746547; PubMed Central PMCID:  
798 PMC53710769.
- 799 74. Pemberton TJ, Szpiech ZA. Relationship between Deleterious Variation, Genomic Autozygosity,  
800 and Disease Risk: Insights from The 1000 Genomes Project. *Am J Hum Genet*. 2018;102(4):658-75.  
801 Epub 2018/03/20. doi: 10.1016/j.ajhg.2018.02.013. PubMed PMID: 29551419.
- 802 75. Colby SL, Ortman JM. Projections of the size and composition of the US population: 2014 to  
803 2060: Population estimates and projections. 2017.
- 804 76. Popejoy AB, Fullerton SM. Genomics is failing on diversity. *Nature*. 2016;538(7624):161-4. doi:  
805 DOI 10.1038/538161a. PubMed PMID: WOS:000386671000016.
- 806 77. Martin AR, Gignoux CR, Walters RK, Wojcik GL, Neale BM, Gravel S, et al. Human Demographic  
807 History Impacts Genetic Risk Prediction across Diverse Populations. *Am J Hum Genet*.  
808 2017;100(4):635-49. Epub 2017/04/04. doi: 10.1016/j.ajhg.2017.03.004. PubMed PMID: 28366442;  
809 PubMed Central PMCID: PMC5384097.
- 810 78. Verdu P, Austerlitz F, Estoup A, Vitalis R, Georges M, Thery S, et al. Origins and genetic diversity  
811 of pygmy hunter-gatherers from Western Central Africa. *Curr Biol*. 2009;19(4):312-8. Epub  
812 2009/02/10. doi: 10.1016/j.cub.2008.12.049. PubMed PMID: 19200724.
- 813 79. Verdu P, Rosenberg NA. A general mechanistic model for admixture histories of hybrid  
814 populations. *Genetics*. 2011;189(4):1413-26. Epub 2011/10/05. doi: 10.1534/genetics.111.132787.  
815 PubMed PMID: 21968194; PubMed Central PMCID: PMC3241432.
- 816 80. Via M, Gignoux CR, Roth LA, Fejerman L, Galanter J, Choudhry S, et al. History shaped the  
817 geographic distribution of genomic admixture on the island of Puerto Rico. *PLoS One*.  
818 2011;6(1):e16513. Epub 2011/02/10. doi: 10.1371/journal.pone.0016513. PubMed PMID:  
819 21304981; PubMed Central PMCID: PMC3031579.
- 820 81. Gravel S. Population genetics models of local ancestry. *Genetics*. 2012;191(2):607-19. Epub  
821 2012/04/12. doi: 10.1534/genetics.112.139808. PubMed PMID: 22491189; PubMed Central PMCID:  
822 PMC3374321.
- 823 82. Moreno-Estrada A, Gravel S, Zakharia F, McCauley JL, Byrnes JK, Gignoux CR, et al.  
824 Reconstructing the population genetic history of the Caribbean. *PLoS Genet*. 2013;9(11):e1003925.  
825 Epub 2013/11/19. doi: 10.1371/journal.pgen.1003925. PubMed PMID: 24244192; PubMed Central  
826 PMCID: PMC3828151 Ancestry.com, 23andMe's "Roots into the Future" project, and Personalis,  
827 Inc. He is on the medical advisory board of Invitae and Med-tek. None of these entities played any role  
828 in the project or research results reported here.
- 829 83. Gravel S, Zakharia F, Moreno-Estrada A, Byrnes JK, Muzzio M, Rodriguez-Flores JL, et al.  
830 Reconstructing Native American migrations from whole-genome and whole-exome data. *PLoS Genet*.  
831 2013;9(12):e1004023. Epub 2014/01/05. doi: 10.1371/journal.pgen.1004023. PubMed PMID:  
832 24385924; PubMed Central PMCID: PMC3873240.

- 833 84. Goldberg A, Verdu P, Rosenberg NA. Autosomal admixture levels are informative about sex  
834 bias in admixed populations. *Genetics*. 2014;198(3):1209-29. Epub 2014/09/07. doi:  
835 10.1534/genetics.114.166793. PubMed PMID: 25194159; PubMed Central PMCID: PMC4224161.
- 836 85. Verdu P, Pemberton TJ, Laurent R, Kemp BM, Gonzalez-Oliver A, Gorodezky C, et al. Patterns of  
837 admixture and population structure in native populations of Northwest North America. *PLoS Genet*.  
838 2014;10(8):e1004530. Epub 2014/08/15. doi: 10.1371/journal.pgen.1004530. PubMed PMID:  
839 25122539; PubMed Central PMCID: PMC4133047.
- 840 86. Homburger JR, Moreno-Estrada A, Gignoux CR, Nelson D, Sanchez E, Ortiz-Tello P, et al.  
841 Genomic Insights into the Ancestry and Demographic History of South America. *PLoS Genet*.  
842 2015;11(12):e1005602. Epub 2015/12/05. doi: 10.1371/journal.pgen.1005602. PubMed PMID:  
843 26636962; PubMed Central PMCID: PMC4670080.
- 844 87. Baharian S, Barakatt M, Gignoux CR, Shringarpure S, Errington J, Blot WJ, et al. The Great  
845 Migration and African-American Genomic Diversity. *PLoS Genet*. 2016;12(5):e1006059. Epub  
846 2016/05/28. doi: 10.1371/journal.pgen.1006059. PubMed PMID: 27232753; PubMed Central PMCID:  
847 PMC4883799.
- 848 88. Browning SR, Browning BL, Daviglus ML, Durazo-Arvizu RA, Schneiderman N, Kaplan RC, et al.  
849 Ancestry-specific recent effective population size in the Americas. *PLoS Genet*. 2018;14(5):e1007385.  
850 Epub 2018/05/26. doi: 10.1371/journal.pgen.1007385. PubMed PMID: 29795556.
- 851 89. Zhu X, Tang H, Risch N. Admixture mapping and the role of population structure for localizing  
852 disease genes. *Adv Genet*. 2008;60:547-69. Epub 2008/03/25. doi: 10.1016/S0065-2660(07)00419-  
853 1. PubMed PMID: 18358332.
- 854 90. Basu A, Tang H, Arnett D, Gu CC, Mosley T, Kardia S, et al. Admixture mapping of quantitative  
855 trait loci for BMI in African Americans: evidence for loci on chromosomes 3q, 5q, and 15q. *Obesity*  
856 (Silver Spring). 2009;17(6):1226-31. Epub 2009/07/09. doi: 10.1038/oby.2009.24. PubMed PMID:  
857 19584881; PubMed Central PMCID: PMC2929755.
- 858 91. Cheng CY, Kao WH, Patterson N, Tandon A, Haiman CA, Harris TB, et al. Admixture mapping of  
859 15,280 African Americans identifies obesity susceptibility loci on chromosomes 5 and X. *PLoS Genet*.  
860 2009;5(5):e1000490. Epub 2009/05/23. doi: 10.1371/journal.pgen.1000490. PubMed PMID:  
861 19461885; PubMed Central PMCID: PMC2679192.
- 862 92. Cheng CY, Reich D, Coresh J, Boerwinkle E, Patterson N, Li M, et al. Admixture mapping of  
863 obesity-related traits in African Americans: the Atherosclerosis Risk in Communities (ARIC) Study.  
864 *Obesity* (Silver Spring). 2010;18(3):563-72. Epub 2009/08/22. doi: 10.1038/oby.2009.282. PubMed  
865 PMID: 19696751; PubMed Central PMCID: PMC2866099.
- 866 93. Torgerson DG, Gignoux CR, Galanter JM, Drake KA, Roth LA, Eng C, et al. Case-control  
867 admixture mapping in Latino populations enriches for known asthma-associated genes. *Journal of*  
868 *Allergy and Clinical Immunology*. 2012;130(1):76-82. e12.
- 869 94. Shriner D. Overview of admixture mapping. *Curr Protoc Hum Genet*. 2013;Chapter 1:Unit 1 23.  
870 Epub 2013/01/15. doi: 10.1002/0471142905.hg0123s76. PubMed PMID: 23315925; PubMed Central  
871 PMCID: PMC3556814.
- 872 95. Galanter JM, Gignoux CR, Torgerson DG, Roth LA, Eng C, Oh SS, et al. Genome-wide association  
873 study and admixture mapping identify different asthma-associated loci in Latinos: the Genes-  
874 environments & Admixture in Latino Americans study. *J Allergy Clin Immunol*. 2014;134(2):295-305.  
875 Epub 2014/01/11. doi: 10.1016/j.jaci.2013.08.055. PubMed PMID: 24406073; PubMed Central  
876 PMCID: PMC4085159.
- 877 96. Spear ML, Hu D, Pino-Yanes M, Huntsman S, Eng C, Levin AM, et al. A Genome-wide Association  
878 and Admixture Mapping Study of Bronchodilator Drug Response in African Americans with Asthma.  
879 *bioRxiv*. 2017. doi: 10.1101/157198.
- 880 97. Mak AC, White MJ, Eckalbar WL, Szpiech ZA, Oh SS, Pino-Yanes M, et al. Whole Genome  
881 Sequencing of Pharmacogenetic Drug Response in Racially Diverse Children with Asthma. *Am J Respir*



- 882 Crit Care Med. 2018. Epub 2018/03/07. doi: 10.1164/rccm.201712-2529OC. PubMed PMID:  
883 29509491.
- 884 98. Lohmueller KE, Indap AR, Schmidt S, Boyko AR, Hernandez RD, Hubisz MJ, et al. Proportionally  
885 more deleterious genetic variation in European than in African populations. *Nature*.  
886 2008;451(7181):994-7. Epub 2008/02/22. doi: 10.1038/nature06611. PubMed PMID: 18288194;  
887 PubMed Central PMCID: PMCPMC2923434.
- 888 99. Tennessen JA, Bigham AW, O'Connor TD, Fu W, Kenny EE, Gravel S, et al. Evolution and  
889 functional impact of rare coding variation from deep sequencing of human exomes. *Science*.  
890 2012;337(6090):64-9. Epub 2012/05/19. doi: 10.1126/science.1219240. PubMed PMID: 22604720;  
891 PubMed Central PMCID: PMCPMC3708544.
- 892 100. Fu W, O'Connor TD, Jun G, Kang HM, Abecasis G, Leal SM, et al. Analysis of 6,515 exomes  
893 reveals the recent origin of most human protein-coding variants. *Nature*. 2013;493(7431):216-20.  
894 Epub 2012/12/04. doi: 10.1038/nature11690. PubMed PMID: 23201682; PubMed Central PMCID:  
895 PMCPMC3676746.
- 896 101. Henn BM, Botigue LR, Bustamante CD, Clark AG, Gravel S. Estimating the mutation load in  
897 human genomes. *Nat Rev Genet*. 2015;16(6):333-43. Epub 2015/05/13. doi: 10.1038/nrg3931.  
898 PubMed PMID: 25963372; PubMed Central PMCID: PMCPMC4959039.
- 899 102. Szpiech ZA, Blant A, Pemberton TJ. GARLIC: Genomic Autozygosity Regions Likelihood-based  
900 Inference and Classification. *Bioinformatics*. 2017;33(13):2059-62. Epub 2017/02/17. doi:  
901 10.1093/bioinformatics/btx102. PubMed PMID: 28205676; PubMed Central PMCID:  
902 PMCPMC5870576.
- 903 103. Adzhubei IA, Schmidt S, Peshkin L, Ramensky VE, Gerasimova A, Bork P, et al. A method and  
904 server for predicting damaging missense mutations. *Nat Methods*. 2010;7(4):248-9. Epub  
905 2010/04/01. doi: 10.1038/nmeth0410-248. PubMed PMID: 20354512; PubMed Central PMCID:  
906 PMCPMC2855889.
- 907 104. Ng PC, Henikoff S. SIFT: Predicting amino acid changes that affect protein function. *Nucleic  
908 Acids Res*. 2003;31(13):3812-4. Epub 2003/06/26. PubMed PMID: 12824425; PubMed Central  
909 PMCID: PMCPMC168916.
- 910 105. Kumar P, Henikoff S, Ng PC. Predicting the effects of coding non-synonymous variants on  
911 protein function using the SIFT algorithm. *Nat Protoc*. 2009;4(7):1073-81. Epub 2009/06/30. doi:  
912 10.1038/nprot.2009.86. PubMed PMID: 19561590.
- 913 106. Choi Y, Chan AP. PROVEAN web server: a tool to predict the functional effect of amino acid  
914 substitutions and indels. *Bioinformatics*. 2015;31(16):2745-7. Epub 2015/04/09. doi:  
915 10.1093/bioinformatics/btv195. PubMed PMID: 25851949; PubMed Central PMCID:  
916 PMCPMC4528627.
- 917 107. Cooper GM, Stone EA, Asimenos G, Program NCS, Green ED, Batzoglou S, et al. Distribution and  
918 intensity of constraint in mammalian genomic sequence. *Genome Res*. 2005;15(7):901-13. Epub  
919 2005/06/21. doi: 10.1101/gr.3577405. PubMed PMID: 15965027; PubMed Central PMCID:  
920 PMCPMC1172034.
- 921 108. Genomes Project C, Auton A, Brooks LD, Durbin RM, Garrison EP, Kang HM, et al. A global  
922 reference for human genetic variation. *Nature*. 2015;526(7571):68-74. Epub 2015/10/04. doi:  
923 10.1038/nature15393. PubMed PMID: 26432245; PubMed Central PMCID: PMCPMC4750478.
- 924 109. Kircher M, Witten DM, Jain P, O'Roak BJ, Cooper GM, Shendure J. A general framework for  
925 estimating the relative pathogenicity of human genetic variants. *Nat Genet*. 2014;46(3):310-5. Epub  
926 2014/02/04. doi: 10.1038/ng.2892. PubMed PMID: 24487276; PubMed Central PMCID:  
927 PMCPMC3992975.
- 928 110. Lohmueller KE. The distribution of deleterious genetic variation in human populations. *Curr  
929 Opin Genet Dev*. 2014;29:139-46. Epub 2014/12/03. doi: 10.1016/j.gde.2014.09.005. PubMed PMID:  
930 25461617.

- 931 111. Pedersen CT, Lohmueller KE, Grarup N, Bjerregaard P, Hansen T, Siegismund HR, et al. The  
932 Effect of an Extreme and Prolonged Population Bottleneck on Patterns of Deleterious Variation:  
933 Insights from the Greenlandic Inuit. *Genetics*. 2017;205(2):787-801. Epub 2016/12/03. doi:  
934 10.1534/genetics.116.193821. PubMed PMID: 27903613; PubMed Central PMCID: PMC5289852.
- 935 112. Mezzavilla M, Vozzi D, Badii R, Alkowari MK, Abdulhadi K, Girotto G, et al. Increased rate of  
936 deleterious variants in long runs of homozygosity of an inbred population from Qatar. *Hum Hered*.  
937 2015;79(1):14-9. Epub 2015/02/28. doi: 10.1159/000371387. PubMed PMID: 25720536.
- 938 113. Mooney J, Huber C, Service S, Sul JH, Marsden C, Zhang Z, et al. Understanding the Hidden  
939 Complexity of Latin American Population Isolates. *bioRxiv*. 2018. doi: 10.1101/340158.
- 940 114. Pino-Yanes M, Thakur N, Gignoux CR, Galanter JM, Roth LA, Eng C, et al. Genetic ancestry  
941 influences asthma susceptibility and lung function among Latinos. *J Allergy Clin Immunol*.  
942 2015;135(1):228-35. Epub 2014/10/11. doi: 10.1016/j.jaci.2014.07.053. PubMed PMID: 25301036;  
943 PubMed Central PMCID: PMC4289103.
- 944 115. Drake KA, Torgerson DG, Gignoux CR, Galanter JM, Roth LA, Huntsman S, et al. A genome-wide  
945 association study of bronchodilator response in Latinos implicates rare variants. *J Allergy Clin*  
946 *Immunol*. 2014;133(2):370-8. Epub 2013/09/03. doi: 10.1016/j.jaci.2013.06.043. PubMed PMID:  
947 23992748; PubMed Central PMCID: PMC3938989.
- 948 116. Delaneau O, Zagury JF, Marchini J. Improved whole-chromosome phasing for disease and  
949 population genetic studies. *Nat Methods*. 2013;10(1):5-6. Epub 2012/12/28. doi:  
950 10.1038/nmeth.2307. PubMed PMID: 23269371.
- 951 117. Maples BK, Gravel S, Kenny EE, Bustamante CD. RFMix: a discriminative modeling approach for  
952 rapid and robust local-ancestry inference. *Am J Hum Genet*. 2013;93(2):278-88. Epub 2013/08/06.  
953 doi: 10.1016/j.ajhg.2013.06.020. PubMed PMID: 23910464; PubMed Central PMCID:  
954 PMC3738819.
- 955 118. Liu X, White S, Peng B, Johnson AD, Brody JA, Li AH, et al. WGS: an annotation pipeline for  
956 human genome sequencing studies. *J Med Genet*. 2016;53(2):111-2. Epub 2015/09/24. doi:  
957 10.1136/jmedgenet-2015-103423. PubMed PMID: 26395054; PubMed Central PMCID:  
958 PMC5124490.  
959
